# Supplementary material for: Systematic elucidation of the effective constituents and potential mechanisms of Scrophulariae Radix against neoplasm based on LC-MS, network pharmacology, and molecular docking approaches
Source: Front Plant Sci. 2025 Jul 3;16:1615076. doi: 10.3389/fpls.2025.1615076 (PMC12267283; doi:10.3389/fpls.2025.1615076)
Supplement: Supplementary file 1 [file Table1.xlsx]

## Sheet: Amino acids and derivatives
NO.	Compounds	Formula	Molecular weight (Da)	Ionization model	Precursor ion (Da)	Product ion (Da)	Collision Energy (eV)	Peak Area	CAS	Class I	Class II
1	L-Norleucine	C6H13NO2	131.095	[M+H]+	132.1	86.1	20.00	1.07679e+08	327-57-1	Amino acids and derivatives	Amino acids and derivatives
2	L-Phenylalanine	C9H11NO2	165.079	[M+H]+	166.09	120.08	20.00	1.06969e+08	63-91-2	Amino acids and derivatives	Amino acids and derivatives
3	3-Hydroxy-L-phenylalanine	C9H11NO3	181.074	[M+H]+	182.08	136.08	20.00	7.83806e+07	587-33-7	Amino acids and derivatives	Amino acids and derivatives
4	L-Tyrosine	C9H11NO3	181.074	[M+H]+	182.08	136.08	20.00	7.56201e+07	60-18-4	Amino acids and derivatives	Amino acids and derivatives
5	N-Methyl-L-proline	C6H11NO2	129.079	[M+H]+	130.09	84.08	20.00	6.62544e+07	475-11-6	Amino acids and derivatives	Amino acids and derivatives
6	DL-Tryptophan	C11H12N2O2	204.09	[M+H]+	205.09	146.06	20.00	6.22491e+07	54-12-6	Amino acids and derivatives	Amino acids and derivatives
7	L-Arginine	C6H14N4O2	174.112	[M+H]+	175.11	70.06	20.00	5.28709e+07	74-79-3	Amino acids and derivatives	Amino acids and derivatives
8	L-Proline	C5H9NO2	115.063	[M+H]+	116.07	70.07	20.00	3.67642e+07	147-85-3	Amino acids and derivatives	Amino acids and derivatives
9	L-Lysine	C6H14N2O2	146.106	[M+H]+	147.11	84.08	20.00	1.78873e+07	56-87-1	Amino acids and derivatives	Amino acids and derivatives
10	L-Glutamine	C5H10N2O3	146.069	[M+H]+	147.08	84.04	20.00	1.73314e+07	56-85-9	Amino acids and derivatives	Amino acids and derivatives
11	L-Leucine*	C6H13NO2	131.095	[M+H]+	132.1	86.1	20.00	9.38689e+06	61-90-5	Amino acids and derivatives	Amino acids and derivatives
12	L-Isoleucine*	C6H13NO2	131.095	[M+H]+	132.102	86.0964	20.00	8.69094e+06	73-32-5	Amino acids and derivatives	Amino acids and derivatives
13	L-Histidine	C6H9N3O2	155.07	[M+H]+	156.08	110.07	20.00	8.47354e+06	71-00-1	Amino acids and derivatives	Amino acids and derivatives
14	Arginine methyl ester	C7H16N4O2	188.127	[M+H]+	189.14	70.07	20.00	5200130	-	Amino acids and derivatives	Amino acids and derivatives
15	L-γ-Glutamyl-L-leucine	C11H20N2O5	260.137	[M+H]+	261.14	86.1	20.00	5.05259e+06	2566-39-4	Amino acids and derivatives	Amino acids and derivatives
16	N-Monomethyl-L-arginine	C7H16N4O2	188.127	[M+H]+	189.13	70.07	20.00	3.11452e+06	17035-90-4	Amino acids and derivatives	Amino acids and derivatives
17	Bestim	C16H19N3O5	333.132	[M+H]+	334.14	188.07	30.00	1694881	66471-20-3	Amino acids and derivatives	Amino acids and derivatives
18	Trimethyllysine	C9H20N2O2	188.153	[M+H]+	189.16	84.08	30.00	486076	23284-33-5	Amino acids and derivatives	Amino acids and derivatives
19	5-Hydroxy-DL-tryptophan(5-HTP)	C11H12N2O3	220.085	[M+H]+	221.09	130.06	20.00	212185	56-69-9	Amino acids and derivatives	Amino acids and derivatives
20	(3-(carboxyamino)-2-methylpropanoyl)phenylalanine	C14H18N2O5	294.122	[M+H]+	295.13	120.08	20.00	3.49741e+06	-	Amino acids and derivatives	Amino acids and derivatives
21	L-Isoleucyl-L-Aspartate	C10H18N2O5	246.122	[M+H]+	247.13	86.09	20.00	1.72439e+06	-	Amino acids and derivatives	Amino acids and derivatives
22	γ-Glutamyl-L-valine	C10H18N2O5	246.122	[M+H]+	247.13	184.1	20.00	223501	-	Amino acids and derivatives	Amino acids and derivatives
23	Hyp-Trp	C16H19N3O4	317.138	[M+H]+	318.15	188.07	20.00	31948.8	-	Amino acids and derivatives	Amino acids and derivatives
24	Hyp-Val	C10H18N2O4	230.127	[M+H]+	231.13	86.06	20.00	14607.8	-	Amino acids and derivatives	Amino acids and derivatives
25	cyclo-(Gly-Phe)	C11H12N2O2	204.09	[M+H]+	205.1	146.06	20.00	6.40745e+07	10125-07-2	Amino acids and derivatives	Amino acids and derivatives
26	L-Methionine methyl ester	C6H13NO2S	163.067	[M+H]+	164.07	104.07	20.00	254619	10332-17-9	Amino acids and derivatives	Amino acids and derivatives
27	N,N-Dimethylglycine*	C4H9NO2	103.063	[M+H]+	104.071	58.0651	20.00	3.67244e+06	1118-68-9	Amino acids and derivatives	Amino acids and derivatives
28	L-Aspartyl-L-Phenylalanine	C13H16N2O5	280.106	[M+H]+	281.11	166.09	20.00	92799.5	13433-09-5	Amino acids and derivatives	Amino acids and derivatives
29	N-Acetyl-L-Arginine	C8H16N4O3	216.122	[M+H]+	217.13	158.08	20.00	719989	155-84-0	Amino acids and derivatives	Amino acids and derivatives
30	Homoarginine	C7H16N4O2	188.127	[M+H]+	189.13	144.1	20.00	234959	156-86-5	Amino acids and derivatives	Amino acids and derivatives
31	3-Methoxy-L-Tyrosine	C10H15NO5	229.095	[M+H]+	212.09	149.06	20.00	75318.2	200630-46-2	Amino acids and derivatives	Amino acids and derivatives
32	N(6),N(6)-Dimethyl-L-lysine	C8H18N2O2	174.137	[M+H]+	175.12	70.07	20.00	6.26094e+07	2259-86-1	Amino acids and derivatives	Amino acids and derivatives
33	S-(Methyl)glutathione	C11H19N3O6S	321.099	[M+H]+	322.11	130.05	20.00	2.01616e+06	2922-56-7	Amino acids and derivatives	Amino acids and derivatives
34	L-Valyl-L-Phenylalanine	C14H20N2O3	264.147	[M+H]+	265.15	72.08	20.00	61697.5	3918-92-1	Amino acids and derivatives	Amino acids and derivatives
35	Pyroglutamic acid	C5H7NO3	129.043	[M+H]+	130.05	84.05	20.00	4.21817e+07	4042-36-8	Amino acids and derivatives	Amino acids and derivatives
36	Methyl 3-aminopropanoate	C4H9NO2	103.063	[M+H]+	104.07	59.01	20.00	3.19427e+06	4138-35-6	Amino acids and derivatives	Amino acids and derivatives
37	Homoproline	C6H11NO2	129.079	[M+H]+	130.09	70.07	20.00	7.05643e+07	56879-46-0	Amino acids and derivatives	Amino acids and derivatives
38	Asp-Lys	C10H19N3O5	261.132	[M+H]+	262.14	84.08	20.00	223829	5891-51-0	Amino acids and derivatives	Amino acids and derivatives
39	N-Ethylglycine*	C4H9NO2	103.063	[M+H]+	104.07	58.07	20.00	3.60246e+06	627-01-0	Amino acids and derivatives	Amino acids and derivatives
40	Phe-Hyp	C14H18N2O4	278.127	[M+H]+	279.13	120.08	20.00	69374	90965-82-5	Amino acids and derivatives	Amino acids and derivatives
41	L-Tryptophan	C11H12N2O2	204.09	[M-H]-	203.08	116.05	-20.00	7.21281e+06	73-22-3	Amino acids and derivatives	Amino acids and derivatives
42	γ-Glutamylphenylalanine	C14H18N2O5	294.122	[M-H]-	293.11	164.07	-20.00	382626	7432-24-8	Amino acids and derivatives	Amino acids and derivatives
43	DL-O-tyrosine	C9H11NO3	181.074	[M-H]-	180.07	119.05	-20.00	12673.4	2370-61-8	Amino acids and derivatives	Amino acids and derivatives
44	3-Hydroxy-3-methylpentane-1,5-dioic acid	C6H10O5	162.053	[M-H]-	161.05	99.05	-20.00	524711	503-49-1	Amino acids and derivatives	Amino acids and derivatives
45	N-α-Acetyl-L-ornithine	C7H14N2O3	174.1	[M-H]-	173.11	131.08	-20.00	2.15709e+06	6205-08-9	Amino acids and derivatives	Amino acids and derivatives

## Sheet: Phenolic acids
NO.	Compounds	Formula	Molecular weight (Da)	Ionization model	Precursor ion (Da)	Product ion (Da)	Collision Energy (eV)	Peak Area	CAS	Class I	Class II
1	2-Methoxy-4-ethenylphenol	C9H10O2	150.068	[M+H]+	639.19	621.18	30.00	2.23829e+06	7786-61-0	Phenolic acids	Phenolic acids
2	Methyl-3-(3-hydroxyphenyl)Propionate	C10H12O3	180.079	[M+H]+	179.03	135.05	30.00	535721	61389-68-2	Phenolic acids	Phenolic acids
3	3,4-O-Dicaffeoylquinic Acid Methyl Ester*	C26H26O12	530.142	[M+H]+	325.09	145.03	30.00	502773	-	Phenolic acids	Phenolic acids
4	3,4'-Dihydroxypropiophenone glucoside	C15H20O8	328.116	[M+H]+	315.07	153.02	30.00	2.20472e+06	-	Phenolic acids	Phenolic acids
5	3,5-O-Dicaffeoylquinic Acid Methyl Ester*	C26H26O12	530.142	[M+H]+	355.1	175.04	30.00	373560	159934-13-1	Phenolic acids	Phenolic acids
6	3,5-Dimethoxy-4-hydroxybenzaldehyde	C9H10O4	182.058	[M+H]+	693.24	175.04	30.00	609464	-	Phenolic acids	Phenolic acids
7	3-Hydroxy-1-(4-Hydroxy-3-Methoxyphenyl)Propan-1-One	C10H12O4	196.074	[M+H]+	205.158	189.129	30.00	3.81791e+06	2196-18-1	Phenolic acids	Phenolic acids
8	3-hydroxybenzaldehyde	C7H6O2	122.037	[M+H]+	205.16	189.13	30.00	2.79314e+06	100-83-4	Phenolic acids	Phenolic acids
9	Martinoside	C31H40O15	652.236	[M+H]+	205.16	133.06	30.00	2.14461e+06	-	Phenolic acids	Phenolic acids
10	Ningposide C	C17H20O8	352.116	[M+H]+	143.05	115.06	30.00	2.79143e+06	-	Phenolic acids	Phenolic acids
11	Ovatoside C	C23H26O11	478.147	[M+H]+	623.2	161.03	30.00	2.27632e+07	-	Phenolic acids	Phenolic acids
12	Scrophuloside A*	C24H26O10	474.153	[M+H]+	475.16	147.04	30.00	1.41205e+06	-	Phenolic acids	Phenolic acids
13	Plantainoside A	C23H26O11	478.147	[M+H]+	431.15	149.05	30.00	1.06462e+06	-	Phenolic acids	Phenolic acids
14	p-Coumaric acid	C9H8O3	164.047	[M+H]+	637.22	443.17	30.00	1.72649e+06	501-98-4	Phenolic acids	Phenolic acids
15	Crenatoside	C29H34O15	622.19	[M+H]+	341.09	195.05	30.00	129583	61276-16-2	Phenolic acids	Phenolic acids
16	Caffeic aldehyde	C9H8O3	164.047	[M+H]+	357.12	195.07	30.00	4.1882e+06	141632-15-7	Phenolic acids	Phenolic acids
17	Methyl caffeate	C10H10O4	194.058	[M+H]+	429.12	429.12	30.00	41195.2	3843-74-1	Phenolic acids	Phenolic acids
18	Leucosceptoside A	C30H38O15	638.221	[M+H]+	517.16	175.04	30.00	1.09653e+07	83529-62-8	Phenolic acids	Phenolic acids
19	Calceolarioside A*	C23H26O11	478.147	[M+H]+	167.07	121.03	30.00	1.59704e+07	84744-28-5	Phenolic acids	Phenolic acids
20	Calceolarioside B*	C23H26O11	478.147	[M+H]+	137.02	93.03	30.00	1.34158e+07	105471-98-5	Phenolic acids	Phenolic acids
21	Calceolarioside D*	C23H26O11	478.147	[M+H]+	591.21	161.02	30.00	2.6441e+07	-	Phenolic acids	Phenolic acids
22	Desrhamnosylacteoside	C23H26O11	478.147	[M+H]+	137.02	93.04	30.00	1.90206e+07	-	Phenolic acids	Phenolic acids
23	Desrhamnosylisoacteoside	C23H26O11	478.147	[M+H]+	315.11	153.06	30.00	9.71466e+06	-	Phenolic acids	Phenolic acids
24	Cistanoside C	C30H38O15	638.221	[M+H]+	561.18	323.11	30.00	7.3141e+06	94492-22-5	Phenolic acids	Phenolic acids
25	Cinnamic acid	C9H8O2	148.052	[M+H]+	183.03	124.02	30.00	5.19224e+07	140-10-3	Phenolic acids	Phenolic acids
26	Arenarioside	C34H44O19	756.248	[M+H]+	309.1	147.05	30.00	218532	94130-58-2	Phenolic acids	Phenolic acids
27	Ethylsalicylate	C9H10O3	166.063	[M+H]+	327.11	165.05	30.00	1.26809e+06	118-61-6	Phenolic acids	Phenolic acids
28	Scrophuloside B*	C24H26O10	474.153	[M+H]+	163.04	119.05	30.00	2.19385e+06	-	Phenolic acids	Phenolic acids
29	Isocrenatoside	C29H34O15	622.19	[M+H]+	623.2	163.03	30.00	414252	221895-09-6	Phenolic acids	Phenolic acids
30	Isoacteoside	C29H36O15	624.205	[M+H]+	137.03	108.02	30.00	1.60556e+07	61303-13-7	Phenolic acids	Phenolic acids
31	Isovanillin	C8H8O3	152.047	[M+H]+	151.08	91.05	30.00	1.30693e+06	621-59-0	Phenolic acids	Phenolic acids
32	Forsythiaside C	C29H36O16	640.2	[M+NH4]+	633.19	145.03	30.00	1.75422e+06	-	Phenolic acids	Phenolic acids
33	(1'R,3R,5R,8'S)-Dihydrophaseic acid-O-β-D-glucoside	C21H32O10	444.2	[M-H]-	149.06	103.06	-20.00	21011	-	Phenolic acids	Phenolic acids
34	(2E)-3-[4-(β-D-glucopyranoside)-phenylacrylic]-acid	C15H18O8	326.1	[M-H]-	623.2	161.02	-20.00	72737.5	-	Phenolic acids	Phenolic acids
35	1,3-Di-p-coumaroyl sucrose	C30H34O15	634.19	[M-H]-	479.15	163.03	-20.00	2112.75	-	Phenolic acids	Phenolic acids
36	1-O-(3,4-Dihydroxy-5-methoxy-benzoyl)-glucoside	C14H18O10	346.09	[M-H]-	623.2	161.02	-20.00	1.31505e+06	-	Phenolic acids	Phenolic acids
37	1-O-p-Coumaroyl Galactonic Acid*	C15H18O9	342.095	[M-H]-	479.15	163.04	-20.00	40149	-	Phenolic acids	Phenolic acids
38	1-O-Feruloyl-3-O-caffeoylglycerol	C22H22O9	430.126	[M-H]-	623.2	161.03	-20.00	11619.3	-	Phenolic acids	Phenolic acids
39	1'-Galactoyl Ferulic acid	C16H20O10	372.106	[M-H]-	479.16	163.04	-20.00	14068.8	-	Phenolic acids	Phenolic acids
40	1-O-p-Coumaroyl-β-D-glucose	C15H18O8	326.1	[M-H]-	623.2	461.17	-20.00	1590502	7139-64-2	Phenolic acids	Phenolic acids
41	1-O-Caffeoyl-(6-O-glucosyl)-β-D-glucose	C21H28O14	504.148	[M-H]-	625.21	163.03	-20.00	27690.8	-	Phenolic acids	Phenolic acids
42	1-O-Caffeoyl-β-D-glucose	C15H18O9	342.095	[M-H]-	479.15	163.04	-20.00	561855	14364-08-0	Phenolic acids	Phenolic acids
43	1-O-Gentisoyl-β-D-glucoside	C13H16O9	316.079	[M-H]-	479.15	163.04	-20.00	1.14029e+06	23445-11-6	Phenolic acids	Phenolic acids
44	1-O-Galloyl-2-O-Cinnamoyl-β-D-glucose	C22H22O11	462.116	[M-H]-	639.23	177.05	-20.00	31419.5	56994-83-3	Phenolic acids	Phenolic acids
45	1-O-Galloyl-β-D-glucose*	C13H16O10	332.074	[M-H]-	479.16	163.04	-20.00	81164.1	58511-73-2	Phenolic acids	Phenolic acids
46	1-O-Cinnamoyl-β-D-glucose	C15H18O7	310.105	[M-H]-	639.23	163	-20.00	54286.5	40004-96-4	Phenolic acids	Phenolic acids
47	1-O-Salicyloyl-β-D-glucose	C13H16O8	300.084	[M-H]-	623.2	461.16	-20.00	39102.8	60517-74-0	Phenolic acids	Phenolic acids
48	1-Naphthol*	C10H8O	144.058	[M-H]-	487.15	179.03	-20.00	2124.64	90-15-3	Phenolic acids	Phenolic acids
49	2-(3,4-dihydroxyphenyl)ethanediol 1-O-β-D-glucopyranoside	C14H20O9	332.111	[M-H]-	165.05	91.05	-20.00	117576	-	Phenolic acids	Phenolic acids
50	2-(3,4-Dihydroxyphenethyl)-5-O-feruloyl-gentiobioside	C30H38O15	624.206	[M-H]-	651.229	175.04	-20.00	139495	-	Phenolic acids	Phenolic acids
51	2-(3,4-Dihydroxyphenethyl)-5-O-Cinnamoyl-gentiobioside	C29H36O14	608.211	[M-H]-	651.23	175.04	-20.00	1.27038e+06	-	Phenolic acids	Phenolic acids
52	2,4-Di-Tert-Butylphenol*	C14H22O	206.167	[M-H]-	151.04	136.02	-20.00	378769	96-76-4	Phenolic acids	Phenolic acids
53	2,5-Dihydroxybenzaldehyde	C7H6O3	138.032	[M-H]-	353.12	147.05	-20.00	1.06615e+06	1194-98-5	Phenolic acids	Phenolic acids
54	2,5-Dihydroxyphenylacetate ethyl triglucoside	C28H42O18	666.237	[M-H]-	651.23	175.04	-20.00	1.013e+07	-	Phenolic acids	Phenolic acids
55	2,6-Diferuloyl-2'-acetylsucrose	C34H40O18	736.221	[M-H]-	783.28	607.23	-20.00	9895.16	-	Phenolic acids	Phenolic acids
56	2,6-Di-tert-butylphenol*	C14H22O	206.167	[M-H]-	653.24	177.05	-20.00	397878	128-39-2	Phenolic acids	Phenolic acids
57	2-β-D-Glucopyranosyloxy-5-hydroxyphenylacetic acidmethylester	C15H20O9	344.111	[M-H]-	193.051	134.037	-20.00	505020	-	Phenolic acids	Phenolic acids
58	2-Naphthol*	C10H8O	144.058	[M-H]-	658.23	163.04	-20.00	2347.41	135-19-3	Phenolic acids	Phenolic acids
59	2-Hydroxycinnamic acid*	C9H8O3	164.047	[M-H]-	165.05	119.05	-20.00	1.00204e+07	583-17-5	Phenolic acids	Phenolic acids
60	3,4-dihydroxy-β-phenylethoxy-O-α-L-rhamnopyranosyl(1→3)-6-O-caffeoyl(cis)-β-D-glucopyranoside	C29H36O15	624.205	[M-H]-	137.02	93.03	-20.00	2.71643e+07	-	Phenolic acids	Phenolic acids
61	3,4-dihydroxy-β-phenylethoxy-O-β-D-apiofuranosyl-(1→4)-α-L-rhamnopyranosyl-(1→3)-β-D-glucopyranoside	C25H38O16	594.216	[M-H]-	153.05	65.04	-20.00	486020	-	Phenolic acids	Phenolic acids
62	Koaburaside	C14H20O9	332.111	[M-H]-	121.03	92.03	-20.00	82689.5	41653-73-0	Phenolic acids	Phenolic acids
63	3-O-p-Coumaroyl Galactonic Acid*	C15H18O9	342.095	[M-H]-	183.06	91.05	-20.00	23788.5	-	Phenolic acids	Phenolic acids
64	3-O-Methylgallic acid	C8H8O5	184.037	[M-H]-	341.09	161.02	-20.00	20044.2	3934-84-7	Phenolic acids	Phenolic acids
65	3-O-Galloyl-D-glucose*	C13H16O10	332.074	[M-H]-	343.1	181.05	-20.00	134223	-	Phenolic acids	Phenolic acids
66	3-methoxy-4-hydroxy-β-phenylethoxy-O-β-D-apiofuranosyl-(1→4)-α-L-rhamnopyranosyl-(1→3)-β-D-glucopyranoside	C26H40O16	608.232	[M-H]-	623.2	163.03	-20.00	290598	-	Phenolic acids	Phenolic acids
67	3-hydroxy-4-methoxy-β-phenylethoxy-O-α-L-rhamnopyranosyl-(1→3)-4-O-feruloyl(trans)-β-D-glucopyranoside	C31H40O15	652.237	[M-H]-	651.23	175.04	-20.00	2.60094e+06	-	Phenolic acids	Phenolic acids
68	3-Hydroxy-4-isopropylbenzylalcohol-3-O-glucoside	C16H24O7	328.152	[M-H]-	769.13	593.21	-20.00	55507	-	Phenolic acids	Phenolic acids
69	4-tert-Octylphenol	C14H22O	206.167	[M-H]-	167.03	108.02	-20.00	10766.5	140-66-9	Phenolic acids	Phenolic acids
70	4-O-β-D-glucopyranosylferulic acid	C16H20O9	356.111	[M-H]-	151.04	136.02	-20.00	851014	-	Phenolic acids	Phenolic acids
71	4-Dihydroxyphenethoxy-8-O-β-D-[6-O-(4-O-β-D-glucopyranosyl)-feruloyl]glucopyranoside	C30H38O15	638.221	[M-H]-	785.25	623.22	-20.00	130977	-	Phenolic acids	Phenolic acids
72	4-caffeoylshikimic acid	C16H16O8	336.084	[M-H]-	299.11	119.05	-20.00	106974	-	Phenolic acids	Phenolic acids
73	4-Hydroxybenzaldehyde	C7H6O2	122.037	[M-H]-	757.25	325.09	-20.00	834166	123-08-0	Phenolic acids	Phenolic acids
74	4-Hydroxybenzoic acid	C7H6O3	138.032	[M-H]-	477.14	161.03	-20.00	1.48345e+06	99-96-7	Phenolic acids	Phenolic acids
75	Doitungbiphenyl A	C18H20O4	300.136	[M-H]-	785.25	623.22	-20.00	192542	-	Phenolic acids	Phenolic acids
76	5-O-p-Coumaroyl Galactonic Acid*	C15H18O9	342.095	[M-H]-	665.21	161.03	-20.00	4360.5	-	Phenolic acids	Phenolic acids
77	5-O-Caffeoylshikimic acid	C16H16O8	336.084	[M-H]-	335.08	135.05	-20.00	135613	73263-62-4	Phenolic acids	Phenolic acids
78	5'-Glucosyloxyjasmanic acid	C18H28O9	388.173	[M-H]-	755.24	593.21	-20.00	23617.2	-	Phenolic acids	Phenolic acids
79	6'-O-Feruloyl-D-sucrose	C22H30O14	518.164	[M-H]-	331.1	153.02	-20.00	2.56818e+06	118230-77-6	Phenolic acids	Phenolic acids
80	6'-O-Sinapoylsucrose	C23H32O15	548.174	[M-H]-	735.25	175.04	-20.00	396775	-	Phenolic acids	Phenolic acids
81	6-O-Caffeoyl-D-glucose	C15H18O9	342.095	[M-H]-	755.24	593.21	-20.00	1.20868e+06	-	Phenolic acids	Phenolic acids
82	Betonyoside D	C36H48O19	784.279	[M-H]-	401.14	269.1	-20.00	2.17936e+06	181301-28-0	Phenolic acids	Phenolic acids
83	C-Veratroylglycol	C10H12O5	212.069	[M-H]-	335.08	179.03	-20.00	62181.5	168293-10-5	Phenolic acids	Phenolic acids
84	dideacetylpicfeoside A	C33H42O16	694.247	[M-H]-	331.1	153.02	-20.00	616070	-	Phenolic acids	Phenolic acids
85	hebitol II	C21H30O14	506.164	[M-H]-	325.09	119.05	-20.00	34402	-	Phenolic acids	Phenolic acids
86	Luteoside B	C34H44O19	756.248	[M-H]-	211.06	148.02	-20.00	111186	-	Phenolic acids	Phenolic acids
87	Luteoside C	C35H46O19	770.263	[M-H]-	401.15	269.11	-20.00	380250	-	Phenolic acids	Phenolic acids
88	monodeacetylpicfeoside A	C35H44O17	736.258	[M-H]-	143.05	115.05	-20.00	113662	-	Phenolic acids	Phenolic acids
89	picfeoside A	C37H46O18	778.268	[M-H]-	665.22	383.12	-20.00	205655	-	Phenolic acids	Phenolic acids
90	Rossicaside	C35H46O20	786.258	[M-H]-	461.17	135.04	-20.00	221207	-	Phenolic acids	Phenolic acids
91	Sanangoside	C23H26O11	478.147	[M-H]-	329.12	121.03	-20.00	213418	-	Phenolic acids	Phenolic acids
92	α-Hydroxycinnamic Acid*	C9H8O3	164.047	[M-H]-	475.16	147.04	-20.00	28278	5801-57-0	Phenolic acids	Phenolic acids
93	Ferulic acid*	C10H10O4	194.058	[M-H]-	345.08	139.04	-20.00	1.83794e+06	537-98-4	Phenolic acids	Phenolic acids
94	Ethyl ferulate	C12H14O4	222.089	[M-H]-	607.2	461.17	-20.00	7742.7	4046-02-0	Phenolic acids	Phenolic acids
95	Feruloylferuloyltartaric acid	C24H22O12	502.111	[M-H]-	341.09	179.03	-20.00	29324	-	Phenolic acids	Phenolic acids
96	Feruloylmalic acid	C14H14O8	310.069	[M-H]-	479.15	163.04	-20.00	23102	-	Phenolic acids	Phenolic acids
97	Cimidahurinine	C14H20O8	316.116	[M-H]-	547.17	223.1	-20.00	691498	142542-89-0	Phenolic acids	Phenolic acids
98	Phenylpropionic acid-O-β-D-glucopyranoside	C15H18O8	326.1	[M-H]-	639.19	161.03	-20.00	55084.2	-	Phenolic acids	Phenolic acids
99	Benzyl β-primeveroside	C18H26O10	402.153	[M-H]-	531.15	177.06	-20.00	42080.5	130622-31-0	Phenolic acids	Phenolic acids
100	Benzyl-(2''-O-xylosyl)glucoside	C18H26O10	402.153	[M-H]-	593.21	229.07	-20.00	109924	-	Phenolic acids	Phenolic acids
101	Androsin	C15H20O8	328.116	[M-H]-	547.17	223.06	-20.00	51095.2	531-28-2	Phenolic acids	Phenolic acids
102	plantainoside E	C30H38O16	654.216	[M-H]-	607.22	149.04	-20.00	146363	-	Phenolic acids	Phenolic acids
103	Martynoside*	C31H40O15	652.237	[M-H]-	777.27	175.04	-20.00	3.45195e+06	67884-12-2	Phenolic acids	Phenolic acids
104	Brevifolin carboxylic acid	C13H8O8	292.022	[M-H]-	299.11	59.01	-20.00	21837.2	18490-95-4	Phenolic acids	Phenolic acids
105	Methyl 4-hydroxybenzoate	C8H8O3	152.047	[M-H]-	653.21	161.02	-20.00	318075	99-76-3	Phenolic acids	Phenolic acids
106	p-Coumaric acid-4-O-glucoside	C15H18O8	326.1	[M-H]-	331.07	169.01	-20.00	590582	117405-48-8	Phenolic acids	Phenolic acids
107	Dihydroferulic acid glucoside	C16H22O9	358.126	[M-H]-	637.21	475.16	-20.00	14698.8	-	Phenolic acids	Phenolic acids
108	Furanofructosyl-α-D-(3-mustard acyl)glucoside	C23H32O15	548.174	[M-H]-	547.17	223.1	-20.00	62229	-	Phenolic acids	Phenolic acids
109	Furanofructosyl-α-D-(6-mustard acyl)glucoside	C23H32O15	548.174	[M-H]-	327.14	165.09	-20.00	585309	-	Phenolic acids	Phenolic acids
110	Tubuloside A	C37H48O21	828.269	[M-H]-	325.09	119.05	-20.00	7438	112516-05-9	Phenolic acids	Phenolic acids
111	Tubuloside B	C31H38O16	666.216	[M-H]-	665.21	503.18	-20.00	200201	112516-04-8	Phenolic acids	Phenolic acids
112	Tubuloside C	C31H38O16	666.216	[M-H]-	341.09	195.05	-20.00	47988.5	-	Phenolic acids	Phenolic acids
113	Osmanthuside H[2-(4-Hydroxyphenyl)ethyl-β-D-apiosyl-(1→6)-β-D-glucoside]	C19H28O11	432.163	[M-H]-	505.16	161.03	-20.00	392483	-	Phenolic acids	Phenolic acids
114	Salidroside	C14H20O7	300.121	[M-H]-	501.1	307.05	-20.00	219575	10338-51-9	Phenolic acids	Phenolic acids
115	Magnoloside D	C29H36O15	624.205	[M-H]-	503.14	341.09	-20.00	3.19644e+07	1418309-03-1	Phenolic acids	Phenolic acids
116	Jionoside B1	C37H50O20	814.289	[M-H]-	387.17	207.1	-20.00	4871.5	120406-37-3	Phenolic acids	Phenolic acids
117	Jionoside C	C29H36O13	592.216	[M-H]-	309.06	193.05	-20.00	1.62416e+06	120406-33-9	Phenolic acids	Phenolic acids
118	Jionoside D	C30H38O15	638.221	[M-H]-	443.19	161.04	-20.00	2.12559e+07	120406-34-0	Phenolic acids	Phenolic acids
119	Caffeic acid	C9H8O4	180.042	[M-H]-	371.1	193.05	-20.00	1.65977e+06	331-39-5	Phenolic acids	Phenolic acids
120	picfeltarraegenin I	C30H44O5	484.319	[M-H]-	735.22	559.17	-20.00	144521	82145-63-9	Phenolic acids	Phenolic acids
121	Forsythoside I*	C29H36O15	624.205	[M-H]-	461.11	153.02	-20.00	22266827	-	Phenolic acids	Phenolic acids
122	Forsythoside H*	C29H36O15	624.205	[M-H]-	341.09	195.05	-20.00	2.48299e+07	-	Phenolic acids	Phenolic acids
123	Forsythoside F; Arenarioside	C34H44O19	756.248	[M-H]-	123.04	77.04	-20.00	128422	-	Phenolic acids	Phenolic acids
124	Orobanchoside	C29H36O16	640.2	[M-H]-	827.27	665.23	-20.00	542923	-	Phenolic acids	Phenolic acids
125	Acteoside; Verbascoside	C29H36O15	624.205	[M-H]-	325.09	163.04	-20.00	1.79406e+07	61276-17-3	Phenolic acids	Phenolic acids
126	Glomeratose A	C24H34O15	562.19	[M-H]-	637.21	161.02	-20.00	345779	202471-84-9	Phenolic acids	Phenolic acids
127	decaffeoylverbascoside	C20H30O12	462.174	[M-H]-	813.28	637.24	-20.00	2.63475e+06	-	Phenolic acids	Phenolic acids
128	Cistanoside A	C36H48O20	800.274	[M-H]-	531.15	177.06	-20.00	262766	93236-42-1	Phenolic acids	Phenolic acids
129	Cistanoside B	C37H50O20	814.289	[M-H]-	291.01	247.02	-20.00	5887	93236-41-0	Phenolic acids	Phenolic acids
130	Cistanoside D	C31H40O15	652.237	[M-H]-	197.08	114.95	-20.00	385419	94492-21-4	Phenolic acids	Phenolic acids
131	Cistanoside F	C21H28O13	488.153	[M-H]-	195.07	89.04	-20.00	5.74291e+06	97411-47-7	Phenolic acids	Phenolic acids
132	Salicylic acid	C7H6O3	138.032	[M-H]-	221.09	133.03	-20.00	248803	69-72-7	Phenolic acids	Phenolic acids
133	Coniferin	C16H22O8	342.132	[M-H]-	341.12	179.07	-20.00	1.09355e+06	531-29-3	Phenolic acids	Phenolic acids
134	Vanillin; 4-Hydroxy-3-Methoxybenzaldehyde	C8H8O3	152.047	[M-H]-	461.11	315.07	-20.00	3.38514e+06	121-33-5	Phenolic acids	Phenolic acids
135	Vanillic acid	C8H8O4	168.042	[M-H]-	163.04	119.05	-20.00	373368	121-34-6	Phenolic acids	Phenolic acids
136	Purpureaside C	C35H46O20	786.258	[M-H]-	331.07	169.01	-20.00	203574	108648-07-3	Phenolic acids	Phenolic acids
137	Isoferulic Acid*	C10H10O4	194.058	[M-H]-	105.07	77.04	-20.00	1.86086e+06	25522-33-2	Phenolic acids	Phenolic acids
138	Isomartynoside*	C31H40O15	652.237	[M-H]-	299.08	137.02	-20.00	3.75528e+06	94410-22-7	Phenolic acids	Phenolic acids
139	Isoforsythoside A	C29H36O15	624.205	[M-H]-	181.09	121.06	-20.00	5.97195e+06	1357910-26-9	Phenolic acids	Phenolic acids
140	Protocatechualdehyde	C7H6O3	138.032	[M-H]-	483.31	439.32	-20.00	780150	139-85-5	Phenolic acids	Phenolic acids
141	Protocatechuic acid 4-O-(6''-O-p-Coumaroyl)Glucoside	C22H22O11	462.116	[M-H]-	813.29	637.24	-20.00	5834.25	-	Phenolic acids	Phenolic acids
142	Campneoside Ⅰ	C30H38O16	654.216	[M-H]-	799.27	161	-20.00	1.31707e+06	95519-12-3	Phenolic acids	Phenolic acids
143	campneoside II	C29H36O16	640.2	[M-H]-	653.21	621.18	-20.00	1774591	-	Phenolic acids	Phenolic acids
144	2-Phenylethanol	C8H10O	122.073	[M-H2O+H]+	193.05	134.04	30.00	662788	60-12-8	Phenolic acids	Phenolic acids

## Sheet: Nucleotides and derivatives
NO.	Compounds	Formula	Molecular weight (Da)	Ionization model	Precursor ion (Da)	Product ion (Da)	Collision Energy (eV)	Peak Area	CAS	Class I	Class II
1	(2r,3s,4r,5s)-2-(6-aminopurin-9-yl)-5-(hydroxymethyl)oxolane-3,4-diol	C10H13N5O4	267.097	[M+H]+	268.11	136.07	30.00	6.5089e+07	-	Nucleotides and derivatives	Nucleotides and derivatives
2	Adenosine	C10H13N5O4	267.097	[M+H]+	268.1	136.06	30.00	6.47265e+07	58-61-7	Nucleotides and derivatives	Nucleotides and derivatives
3	5'-Deoxy-5'-(methylthio)adenosine	C11H15N5O3S	297.09	[M+H]+	298.1	136.06	30.00	1.22906e+07	2457-80-9	Nucleotides and derivatives	Nucleotides and derivatives
4	Guanosine	C10H13N5O5	283.092	[M+H]+	284.1	152.06	40.00	7.69279e+06	118-00-3	Nucleotides and derivatives	Nucleotides and derivatives
5	N-(1-Deoxy-1-fructosyl)Valine	C11H21NO7	279.132	[M+H]+	280.14	216.12	30.00	2.59677e+06	-	Nucleotides and derivatives	Nucleotides and derivatives
6	5-Aminoimidazole ribonucleotide	C8H14N3O7P	295.057	[M+H]+	296.07	104.11	30.00	1.66663e+06	25635-88-5	Nucleotides and derivatives	Nucleotides and derivatives
7	N-(1-Deoxy-1-fructosyl)Histidine	C12H19N3O7	317.122	[M+H]+	318.13	238.12	30.00	70117.8	-	Nucleotides and derivatives	Nucleotides and derivatives
8	4-methyl-1,5,2,3-dioxadiazinan-2-amine	C3H9N3O2	119.07	[M+H]+	120.08	77.04	30.00	1.5173e+07	-	Nucleotides and derivatives	Nucleotides and derivatives
9	N-(1-Deoxy-1-fructosyl)Tyrosine	C15H21NO8	343.126	[M+H]+	344.13	182.08	30.00	1.32744e+06	-	Nucleotides and derivatives	Nucleotides and derivatives
10	N-(1-Deoxy-1-fructosyl)Arginine	C12H24N4O7	336.164	[M+H]+	337.18	175.12	30.00	412658	-	Nucleotides and derivatives	Nucleotides and derivatives
11	Isocytosine	C4H5N3O	111.043	[M+H]+	112.05	70.03	30.00	2.79271e+06	108-53-2	Nucleotides and derivatives	Nucleotides and derivatives
12	8-Azaguanine	C4H4N6O	152.045	[M+H]+	153.05	136.03	30.00	67885.5	134-58-7	Nucleotides and derivatives	Nucleotides and derivatives
13	Crotonoside; 2-Hydroxyadenosine	C10H13N5O5	283.092	[M+H]+	284.1	152.06	30.00	1.13977e+07	1818-71-9	Nucleotides and derivatives	Nucleotides and derivatives
14	2'-O-Methyladenosine	C11H15N5O4	281.112	[M+H]+	282.12	136.06	30.00	650676	2140-79-6	Nucleotides and derivatives	Nucleotides and derivatives
15	Succinyladenosine	C14H17N5O8	383.108	[M+H]+	384.12	252.07	30.00	931373	4542-23-8	Nucleotides and derivatives	Nucleotides and derivatives
16	1-Methyladenine	C6H7N5	149.07	[M+H]+	150.08	133.05	30.00	84929.2	5142-22-3	Nucleotides and derivatives	Nucleotides and derivatives
17	Guanine	C5H5N5O	151.049	[M+H]+	152.06	135.03	30.00	47206.2	73-40-5	Nucleotides and derivatives	Nucleotides and derivatives
18	N-(1-Deoxy-1-fructosyl)Leucine	C12H23NO7	293.147	[M-H]-	292.14	130.09	-30.00	4.56156e+06	-	Nucleotides and derivatives	Nucleotides and derivatives
19	Xanthosine	C10H12N4O6	284.076	[M-H]-	283.07	151.03	-30.00	911605	146-80-5	Nucleotides and derivatives	Nucleotides and derivatives
20	Riboflavin 5'-Adenosine Diphosphate	C27H33N9O15P2	785.157	[M-H]-	784.15	437.09	-30.00	184598	146-14-5	Nucleotides and derivatives	Nucleotides and derivatives
21	Uridine	C9H12N2O6	244.07	[M-H]-	243.06	110.02	-30.00	430037	58-96-8	Nucleotides and derivatives	Nucleotides and derivatives
22	Flavin Single Nucleotide(FMN)	C17H21N4O9P	456.105	[M-H]-	455.1	96.97	-30.00	55020.2	6184-17-4	Nucleotides and derivatives	Nucleotides and derivatives

## Sheet: Flavonoids
NO.	Compounds	Formula	Molecular weight (Da)	Ionization model	Precursor ion (Da)	Product ion (Da)	Collision Energy (eV)	Peak Area	CAS	Class I	Class II
1	Luteolin-7-O-glucoside (Cynaroside)	C21H20O11	448.101	[M+H]+	449.11	287.06	30.00	1.13264e+06	5373-11-5	Flavonoids	Flavones
2	Luteolin-7-O-neohesperidoside (Lonicerin)*	C27H30O15	594.159	[M+H]+	595.17	287.06	30.00	210686	25694-72-8	Flavonoids	Flavones
3	Apigenin-7-O-rutinoside (Isorhoifolin)	C27H30O14	578.164	[M+H]+	579.17	271.04	30.00	75159.2	552-57-8	Flavonoids	Flavones
4	Luteolin-7-O-rutinoside*	C27H30O15	594.159	[M+H]+	595.17	287.06	30.00	32902	3563-98-2	Flavonoids	Flavones
5	Apigenin-6-C-xyloside-8-C-arabinoside	C25H26O13	534.137	[M+H]+	535.14	517.13	30.00	18651	-	Flavonoids	Flavones
6	6,7,8-Tetrahydroxy-5-methoxyflavone*	C16H12O6	300.063	[M+H]+	301.07	286.05	30.00	12207.6	-	Flavonoids	Flavones
7	Hispidulin (5,7,4'-Trihydroxy-6-methoxyflavone)*	C16H12O6	300.063	[M+H]+	301.07	286.05	30.00	30401	1447-88-7	Flavonoids	Flavones
8	Apigenin-7-O-neohesperidoside (Rhoifolin)	C27H30O14	578.164	[M+H]+	579.17	271.06	30.00	101382	17306-46-6	Flavonoids	Flavones
9	Hispidulin-7-O-glucoside(Homoplantaginin)	C22H22O11	462.116	[M+H]+	463.13	301.07	30.00	266929	17680-84-1	Flavonoids	Flavones
10	Phellodendroside	C26H30O11	518.179	[M+H]+	519.19	357.13	30.00	11057.8	40451-69-2	Flavonoids	Flavanonols
11	Taxifolin(Dihydroquercetin)	C15H12O7	304.058	[M+H]+	305.06	231.06	30.00	17409.5	480-18-2	Flavonoids	Flavanonols
12	hydnocarpin	C25H20O9	464.111	[M+H]+	465.12	257.04	30.00	8493.56	51419-48-8	Flavonoids	Flavones
13	Phellamurin	C26H30O11	518.179	[M+H]+	519.19	357.13	30.00	341025	52589-11-4	Flavonoids	Flavanonols
14	Apigenin-7-O-glucoside(Cosmosiin)	C21H20O10	432.106	[M+H]+	433.11	271.07	30.00	290742	578-74-5	Flavonoids	Flavones
15	6-Methoxykaempferol-3-O-glucoside	C22H22O12	478.111	[M+H]+	479.12	317.07	30.00	139243	63422-27-5	Flavonoids	Flavonols
16	Dihydrocharcone-4'-O-glucoside	C21H24O10	436.137	[M-H]-	435.13	273.08	-30.00	172833	-	Flavonoids	Chalcones
17	5,7,2'-Trhiyroxy-8-methoxyflavone*	C16H12O6	300.063	[M-H]-	299.06	284.04	-30.00	22276.3	-	Flavonoids	Flavones
18	Phellatin	C26H30O12	534.174	[M-H]-	533.17	371.11	-30.00	14568.2	-	Flavonoids	Flavonols
19	Kaempferol-3-O-robinobioside(Biorobin)*	C27H30O15	594.159	[M-H]-	593.15	285.04	-30.00	121448	17297-56-2	Flavonoids	Flavonols
20	Kaempferol-3-O-rutinoside(Nicotiflorin)*	C27H30O15	594.159	[M-H]-	593.15	285.04	-30.00	15658	17650-84-9	Flavonoids	Flavonols
21	Kaempferol-3-O-galactoside (Trifolin)	C21H20O11	448.101	[M-H]-	447.09	285.04	-30.00	398367	23627-87-4	Flavonoids	Flavonols
22	Diosmetin (5,7,3'-Trihydroxy-4'-methoxyflavone)*	C16H12O6	300.063	[M-H]-	299.06	284.03	-30.00	33293.4	520-34-3	Flavonoids	Flavones
23	Choerospondin	C21H22O10	434.121	[M-H]-	433.11	271.06	-30.00	30312.2	81202-36-0	Flavonoids	Flavanones
24	Carthamone	C21H20O11	448.101	[M-H]-	447.09	285.04	-30.00	352026	86579-00-2	Flavonoids	Chalcones

## Sheet: Quinones
NO.	Compounds	Formula	Molecular weight (Da)	Ionization model	Precursor ion (Da)	Product ion (Da)	Collision Energy (eV)	Peak Area	CAS	Class I	Class II
1	Hedycaffeoylglucoside A	C15H16O8	324.084	[M+H]+	325.09	163.04	30.00	4.22031e+07	-	Quinones	Anthraquinone
2	de-O-methyllasiodiplodin	C16H22O4	278.152	[M+H]+	279.16	149.03	30.00	1.66507e+07	-	Quinones	Quinones
3	4,8-Dihydroxy Naphthol-1-O-glucoside	C16H18O8	338.1	[M+H]+	339.11	177.05	30.00	9.06944e+06	-	Quinones	Quinones
4	α-Hydrojuglone glucoside	C16H18O8	338.1	[M+H]+	339.11	177.05	30.00	2.71467e+06	-	Quinones	Quinones
5	2-Methoxy-6-undecyl-1,4-benzoquinone	C18H28O3	292.204	[M+H]+	293.21	55.05	30.00	1.35666e+06	-	Quinones	Quinones
6	2,5-Dimethoxybenzoquinone*	C8H8O4	168.042	[M+H]+	169.05	65.04	30.00	125163	3117-03-1	Quinones	Quinones
7	2,6-Dimethoxy-1,4-benzoquinone*	C8H8O4	168.042	[M+H]+	169.05	65	30.00	165687	530-55-2	Quinones	Quinones
8	Embelin	C17H26O4	294.183	[M-H]-	293.18	221.15	-30.00	2.69733e+06	550-24-3	Quinones	Quinones
9	Chrysophanol-9-anthrone	C15H12O3	240.079	[M-H]-	239.07	223.03	-30.00	958607	491-58-7	Quinones	Anthraquinone

## Sheet: Lignans and Coumarins
NO.	Compounds	Formula	Molecular weight (Da)	Ionization model	Precursor ion (Da)	Product ion (Da)	Collision Energy (eV)	Peak Area	CAS	Class I	Class II
1	Skimmin (7-Hydroxycoumarin-7-O-glucoside)	C15H16O8	324.084	[M+H]+	325.09	163.04	30.00	5.38338e+07	93-39-0	Lignans and Coumarins	Coumarins
2	7-Methoxycoumarin	C10H8O3	176.047	[M+H]+	177.05	89.04	30.00	2.16858e+07	531-59-9	Lignans and Coumarins	Coumarins
3	coumarin(ISO2)	C9H6O2	146.037	[M+H]+	147.04	91.06	30.00	1.21823e+07	-	Lignans and Coumarins	Coumarins
4	7-C-Glucosylcoumarin	C15H16O7	308.09	[M+H]+	309.1	147.04	30.00	1.16447e+07	-	Lignans and Coumarins	Coumarins
5	6-hydroxycoumarin	C9H6O3	162.032	[M+H]+	163.04	89.04	30.00	8.05674e+06	6093-68-1	Lignans and Coumarins	Coumarins
6	7-hydroxy-2H-1-benzopyran-2-one	C9H6O3	162.032	[M+H]+	163.04	89.04	30.00	2.98895e+06	-	Lignans and Coumarins	Coumarins
7	Hydroxymethyl coumarin glucoside	C16H18O8	338.1	[M+H]+	339.11	177.05	30.00	620970	-	Lignans and Coumarins	Coumarins
8	Umbelliferone 7-O-Rutinoside	C21H26O12	470.142	[M+H]+	471.15	163.04	30.00	321010	-	Lignans and Coumarins	Coumarins
9	tortoside f	C26H30O11	518.179	[M+H]+	519.18	339.12	30.00	174386	-	Lignans and Coumarins	Lignans
10	5-[(2r,3s,4s,5s)-5-(2h-1,3-benzodioxol-5-yl)-3,4-dimethyloxolan-2-yl]-2-methoxyphenol	C20H22O5	342.147	[M+H]+	343.15	163.07	30.00	27549.9	-	Lignans and Coumarins	Lignans
11	Phyllnirurin	C20H22O5	342.147	[M+H]+	343.15	163.07	30.00	24039.8	120396-53-4	Lignans and Coumarins	Lignans
12	Isoshonanin	C20H22O5	342.147	[M+H]+	343.15	105.03	30.00	14610.3	-	Lignans and Coumarins	Lignans
13	O-Feruloyl 4-hydroxycoumarin	C19H14O6	338.079	[M+H]+	339.09	177.05	30.00	1.70697e+07	-	Lignans and Coumarins	Coumarins
14	O-Feruloyl 3-hydroxycoumarin	C19H14O6	338.079	[M+H]+	339.09	177.05	30.00	1077664	-	Lignans and Coumarins	Coumarins
15	Esculin glucoside	C21H26O14	502.132	[M+H]+	503.14	179.03	30.00	154135	-	Lignans and Coumarins	Coumarins
16	Dehydrodiconiferyl alcohol-gamma'-O-glucoside*	C26H32O11	520.194	[M+H]+	521.2	131.05	30.00	52008.8	-	Lignans and Coumarins	Lignans
17	saikolignanoside D	C26H32O11	520.194	[M+H]+	521.2	131.05	30.00	26761	-	Lignans and Coumarins	Lignans
18	Dehydrodiconiferyl alcohol-4-O-glucoside*	C26H32O11	520.194	[M+H]+	521.2	131.05	30.00	45747	107870-88-2	Lignans and Coumarins	Lignans
19	Demethylsuberosin	C14H14O3	230.094	[M+H]+	231.1	175.04	30.00	57021.9	21422-04-8	Lignans and Coumarins	Coumarins
20	7,8-Dihydroxy-4-phenylcoumarin	C15H10O4	254.058	[M+H]+	255.07	181.07	30.00	57196.6	842-01-3	Lignans and Coumarins	Coumarins
21	Angoroside C	C36H48O19	784.279	[M-H]-	783.27	175.04	-30.00	7.33482e+06	115909-22-3	Lignans and Coumarins	Lignans
22	Heteroclitin A	C28H36O8	500.241	[M-H]-	499.24	307.17	-30.00	3.37508e+06	140369-75-1	Lignans and Coumarins	Lignans
23	3,4-Methylenedioxy cinnamyl alcohol	C10H10O3	178.063	[M-H]-	177.06	117.04	-30.00	1.10826e+06	58095-76-4	Lignans and Coumarins	Lignans
24	Manglieside D	C26H34O11	522.21	[M-H]-	521.2	329.14	-30.00	77888.2	-	Lignans and Coumarins	Lignans
25	Saikolignanoside A	C26H34O11	522.21	[M-H]-	521.2	329.14	-30.00	66449.2	-	Lignans and Coumarins	Lignans
26	Tortoside B	C28H38O13	582.231	[M-H]-	581.22	329.14	-30.00	63354.2	-	Lignans and Coumarins	Lignans
27	1-Hydroxypinoresinol-4'-O-Glucoside	C26H32O12	536.189	[M-H]-	535.18	373.13	-30.00	188747	-	Lignans and Coumarins	Lignans
28	5'-Methoxyisolariciresinol-9'-O-glucoside	C27H36O12	552.221	[M-H]-	551.21	389.17	-30.00	71040.2	-	Lignans and Coumarins	Lignans
29	3,4-Dihydrocoumarin	C9H8O2	148.052	[M-H]-	147.05	119.05	-30.00	592243	119-84-6	Lignans and Coumarins	Coumarins
30	Erythro-Guaiacylglycerol-β-threo-syringylglycerol Ether	C21H28O10	440.168	[M-H]-	439.16	195.07	-30.00	40253	1313434-74-0	Lignans and Coumarins	Lignans
31	Syringaresinol-4'-O-glucoside; Acanthoside B	C28H36O13	580.216	[M-H]-	579.21	417.16	-30.00	99460.2	7374-79-0	Lignans and Coumarins	Lignans
32	1-Hydroxypinoresinol-1-O-Glucoside	C26H32O12	536.189	[M-H]-	535.18	373.13	-30.00	42647.2	81495-71-8	Lignans and Coumarins	Lignans

## Sheet: other
NO.	Compounds	Formula	Molecular weight (Da)	Ionization model	Precursor ion (Da)	Product ion (Da)	Collision Energy (eV)	Peak Area	CAS	Class I	Class II
35	3-Methylbutyl 6-O-(alpha-L-arabinopyranosyl)-beta-D-glucopyranoside	C16H30O10	382.184	[M+CH3COOH-H]-	357.2	275.2	-30.00	5.22616e+06	-	Others	Others
37	1-Hexanol arabinosylglucoside	C17H32O10	396.2	[M+CH3COOH-H]-	423.22	291.18	-30.00	1.24553e+06	-	Others	Others
40	Glucosyl 6-Hydroxy-2,6-Dimethyl-2E,7-Octadienoate	C16H26O8	346.163	[M+CH3COOH-H]-	341.12	73.03	-30.00	171600	-	Others	Others
2	2-Amino-1,3-eicosanediol	C20H43NO2	329.329	[M+H]+	329.12	167.07	30.00	1.18682e+06	-	Others	Alcohol compounds
3	Medicarpinglucoside	C22H24O9	432.142	[M+H]+	367.14	161.06	30.00	246485	-	Others	Alcohol compounds
4	4-hydroxyphenyl acrylaldehyde	C9H8O3	164.047	[M+H]+	279.16	149.02	30.00	2.0214e+06	-	Others	Aldehyde compounds
5	Mesitaldehyde	C10H12O	148.089	[M+H]+	541.19	177.05	30.00	12195.1	487-68-3	Others	Aldehyde compounds
6	6-Hydroxymellein	C10H10O4	194.057	[M+H]+	341.11	179.06	30.00	794510	70901-60-9	Others	Chromone
7	Glucosyl-5-hydroxychromone-7-O-β-D-glucoside	C21H26O14	502.132	[M+H]+	195.05	75.01	30.00	206672	-	Others	Chromone
8	Hamaudol	C15H16O5	276.1	[M+H]+	359.22	277.22	30.00	18949.7	735-46-6	Others	Chromone
9	Cimifugin-7-O-glucoside	C22H28O11	468.163	[M+H]+	383.13	177.05	30.00	45221.2	80681-45-4	Others	Chromone
10	5,7-Dihydroxychromone glucoside	C15H16O9	340.079	[M+H]+	195.07	117.03	30.00	728749	-	Others	Ketone compounds
11	Aquilegiolide	C8H8O3	152.047	[M+H]+	341.11	89.02	30.00	514384	94481-79-5	Others	Ketone compounds
13	Griffonilide	C8H8O4	168.042	[M+H]+	503.16	179	30.00	522175	61371-55-9	Others	Lactones
14	1-[3-methoxy-4-[(2S,3R,4S,5S,6R)-3,4,5-trihydroxy-6-(hydroxymethyl)oxan-2-yl]oxyphenyl]ethanone	C15H20O8	328.116	[M+H]+	165.04	75.01	30.00	2.01438e+07	-	Others	Others
15	[(2R,3R,4R,5S,6S)-4-acetyloxy-2,5-dihydroxy-6-methyloxan-3-yl](E)-3-(4-methoxyphenyl)prop-2-enoate	C18H22O8	366.132	[M+H]+	341.11	89.02	30.00	1.51021e+07	-	Others	Others
16	cytosporone C	C16H22O4	278.152	[M+H]+	341.109	89.0249	30.00	1.36451e+07	-	Others	Others
17	8-O-feruloylharpagide	C25H32O13	540.184	[M+H]+	341.11	113.02	30.00	1.12308e+07	-	Others	Others
19	Ningpogoside A	C18H22O9	382.126	[M+H]+	256.26	102.09	30.00	4.4841e+06	-	Others	Others
20	3ξ-(1ξ-Hydroxyethyl)-7-hydroxy-1-isobenzofuranone	C10H10O4	194.058	[M+H]+	503.16	383.12	30.00	3.97364e+06	-	Others	Others
21	palmitic amide	C16H33NO	255.256	[M+H]+	341.11	119.03	30.00	1.73148e+06	-	Others	Others
22	6''-O-(p-coumaroyl)harpagide	C24H30O12	510.174	[M+H]+	511.18	147.04	30.00	1564095	-	Others	Others
24	Etherolenic acid	C18H28O3	292.204	[M+H]+	307.26	307.26	30.00	632664	-	Others	Others
25	Aucubina	C15H22O9	346.126	[M+H]+	330.34	312.33	30.00	545142	-	Others	Others
26	6-O-β-glucosylaucubin	C21H32O14	508.179	[M+H]+	195.06	117.03	30.00	528458	-	Others	Others
38	6''-O-α-D-galactopyranosylharpagoside	C30H40O16	656.232	[M+H]+	218.11	88.04	30.00	334704	-	Others	Others
48	Feruloyl caffeoyl quininyl glucoside	C32H36O17	692.195	[M+H]+	165.05	119.05	30.00	23102.5	-	Others	Others
54	Ergosterol peroxide	C28H44O3	428.329	[M+H]+	433.15	271.1	30.00	21196.8	2061-64-5	Others	Others
56	Pyridoxine-5'-O-(6''-feruloyl)glucoside	C24H29NO11	507.174	[M+H]+	184.06	148.04	30.00	78702.2	-	Others	Vitamin
57	Pyridoxal	C8H9NO3	167.058	[M+H]+	503.16	113.02	30.00	335848	66-72-8	Others	Vitamin
58	4-Pyridoxic acid	C8H9NO4	183.053	[M+H]+	153.05	77.04	30.00	106072	82-82-6	Others	Vitamin
59	Nicotinamide	C6H6N2O	122.048	[M+H]+	123.06	80.05	30.00	6.35858e+06	98-92-0	Others	Vitamin
1	Eucommiol	C9H16O4	188.105	[M-H]-	133.01	71.01	-30.00	1.33475e+06	55930-44-4	Others	Alcohol compounds
12	Machilusolide D	C18H30O3	294.219	[M-H]-	341.11	119.03	-30.00	2.70642e+06	-	Others	Lactones
18	Moniliferanone D	C22H32O4	360.23	[M-H]-	503.16	179.06	-30.00	4.8773e+06	-	Others	Others
23	9,12-Octadecadienoic acid,ethyl ester	C20H36O2	308.272	[M-H]-	187.1	169.09	-30.00	1.29366e+06	6114-21-2	Others	Others
27	Pentadecanoic acid,14-methyl-,methyl ester	C17H34O2	270.256	[M-H]-	179.06	87.01	-30.00	396421	5129-60-2	Others	Others
28	Mediterraneone	C22H30O4	358.214	[M-H]-	293.21	219.17	-30.00	302834	133301-13-0	Others	Others
29	Cystomexicone A	C22H30O4	358.214	[M-H]-	347.13	167.07	-30.00	301606	-	Others	Others
30	Octyl 6-O-Alpha-L-Arabinopyranosyl-Beta-D-Glucopyranoside	C19H36O10	424.231	[M-H]-	509.18	149.06	-30.00	183277	168288-07-1	Others	Others
31	3-Hydroxy-1-(4'-hydroxy-3'-methoxyphenyl)-propan-1-one	C10H12O4	196.074	[M-H]-	259.02	96.97	-30.00	119649	-	Others	Others
32	piscrocin C	C10H12O5	212.069	[M-H]-	259.02	96.97	-30.00	51051.2	-	Others	Others
33	Epoxyeleganolactone	C20H30O4	334.214	[M-H]-	269.25	269.25	-30.00	37802.2	-	Others	Others
34	Rubusin B	C12H6O7	262.011	[M-H]-	259.022	96.9688	-30.00	1406.26	-	Others	Others
36	picroroside A	C24H30O12	510.174	[M-H]-	357.2	275.2	-30.00	3.50097e+06	-	Others	Others
39	picrogentioside D	C26H34O14	570.195	[M-H]-	195.07	150.03	-30.00	288843	-	Others	Others
41	scroneoside B	C23H26O11	478.147	[M-H]-	211.06	148.02	-30.00	164099	-	Others	Others
42	syringaresinol-4-O-β-D-glucopyranoside	C28H36O13	580.216	[M-H]-	333.2	251.2	-30.00	102017	-	Others	Others
43	Hebitol I	C19H28O12	448.158	[M-H]-	261	181.05	-30.00	67421.8	-	Others	Others
44	picroside Ⅲ	C25H30O13	538.169	[M-H]-	179.06	59.01	-30.00	59055.5	-	Others	Others
45	25-(acetyloxy)-2-(β-D-glucopyranosyloxy)-3,16,20-trihydroxy-9-methyl-19-norlanost-5-en-22-one	C38H62O12	710.424	[M-H]-	441.2	249.13	-30.00	38345.3	-	Others	Others
46	picrorhizaoside D	C37H46O22	842.248	[M-H]-	509.17	145.03	-30.00	36099.2	-	Others	Others
47	Glucosyl 5,8-dihydroxy-2,6-dimethylocta-2,6-dienoic acid	C16H26O9	362.158	[M-H]-	293.21	293.21	-30.00	28636.5	-	Others	Others
49	scroside A	C37H50O21	830.284	[M-H]-	455.21	263.15	-30.00	18266.5	-	Others	Others
50	2-Hydroxy-7-carboxy-1-methyl-5-ethenyl-9,10-dihydrophenanthrene*	C18H16O3	280.11	[M-H]-	341.09	179.03	-30.00	15811.6	-	Others	Others
51	2-Hydroxy-8-carboxy-1-methyl-5-ethenyl-9,10-dihydrophenanthrene*	C18H16O3	280.11	[M-H]-	333.06	333.06	-30.00	14388.9	-	Others	Others
52	25-(acetyloxy)-2-(β-D-glucopyranosyloxy)-3,16-dihydroxy-9-methyl-19-norlanosta-5,23-dien-22-one	C38H60O11	692.414	[M-H]-	657.23	167.07	-30.00	12520.4	-	Others	Others
53	(Z)-3,8-Dihydro 6,6·;7,3'a-diligustilide	C24H30O4	382.214	[M-H]-	569.19	205.05	-30.00	10998.5	-	Others	Others
55	D-Pantothenic Acid	C9H17NO5	219.111	[M-H]-	469.17	307.12	-30.00	132740	79-83-4	Others	Vitamin

## Sheet: Saccharides
NO.	Compounds	Formula	Molecular weight (Da)	Ionization model	Precursor ion (Da)	Product ion (Da)	Collision Energy (eV)	Peak Area	CAS	Class I	Class II
22	Decanoyl arabinosylglucoside	C21H38O11	466.241	[M+CH3COOH-H]-	179.06	59.01	-30.00	7328.25	-	Others	Saccharides
29	Planteose	C18H32O16	504.169	[M+H]+	237.13	98.97	30.00	952572	470-57-5	Others	Saccharides
31	Butyl beta-D-glucoside	C10H20O6	236.126	[M+H]+	179.06	59.01	30.00	149081	5391-18-4	Others	Saccharides
1	3-Dehydro-L-Threonic Acid	C4H6O5	134.022	[M-H]-	503.14	179.03	-30.00	4.2143e+07	-	Others	Saccharides
2	Galactinol	C12H22O11	342.116	[M-H]-	405.18	183.1	-30.00	9.03428e+06	3687-64-7	Others	Saccharides
3	Gluconic acid	C6H12O7	196.058	[M-H]-	477.14	161.03	-30.00	7.71159e+06	526-95-4	Others	Saccharides
4	Lactobiose	C12H22O11	342.116	[M-H]-	445.13	121.03	-30.00	3.62128e+06	63-42-3	Others	Saccharides
5	D-Sucrose	C12H22O11	342.116	[M-H]-	579.21	417.16	-30.00	3.48023e+06	57-50-1	Others	Saccharides
6	Raffinose	C18H32O16	504.169	[M-H]-	508.18	152.4	-30.00	3.42154e+06	512-69-6	Others	Saccharides
7	D-Xylonic acid	C5H10O6	166.048	[M-H]-	447.15	225.08	-30.00	3.0128e+06	526-91-0	Others	Saccharides
8	D-Maltose	C12H22O11	342.116	[M-H]-	537.16	175.04	-30.00	2.84098e+06	69-79-4	Others	Saccharides
9	Isomaltulose	C12H22O11	342.116	[M-H]-	709.42	649.4	-30.00	2.41311e+06	13718-94-0	Others	Saccharides
10	Melibiose	C12H22O11	342.116	[M-H]-	841.24	679.19	-30.00	1.7778e+06	585-99-9	Others	Saccharides
11	D-Panose	C18H32O16	504.169	[M-H]-	361.15	199.1	-30.00	1.77474e+06	33401-87-5	Others	Saccharides
12	Manninotriose	C18H32O16	504.169	[M-H]-	693.2	177.05	-30.00	1.69146e+06	13382-86-0	Others	Saccharides
13	D-Trehalose	C12H22O11	342.116	[M-H]-	829.29	667.23	-30.00	1.60963e+06	99-20-7	Others	Saccharides
14	Inositol	C6H12O6	180.063	[M-H]-	279.1	235.11	-30.00	775385	87-89-8	Others	Saccharides
15	D-Glucose 6-phosphate*	C6H13O9P	260.03	[M-H]-	279.1	235.11	-30.00	425481	56-73-5	Others	Saccharides
16	Glucose-1-phosphate*	C6H13O9P	260.03	[M-H]-	691.41	631.39	-30.00	407632	59-56-3	Others	Saccharides
17	D-Fructose 6-Phosphate*	C6H13O9P	260.03	[M-H]-	381.2	299.2	-30.00	311001	643-13-0	Others	Saccharides
18	D-Cellobiose	C12H22O11	342.116	[M-H]-	525.26	333.19	-30.00	65056	528-50-7	Others	Saccharides
19	sorbose	C6H12O6	180.063	[M-H]-	165.08	59.02	-30.00	6.01423e+06	-	Others	Saccharides
20	1-(sn-Glycero-3-phospho)-1D-myo-inositol	C9H19O11P	334.067	[M-H]-	665.21	485.15	-30.00	644010	-	Others	Saccharides
21	1´-O-Benzoylsucrose	C19H26O12	446.142	[M-H]-	429.34	411.55	-30.00	132162	-	Others	Saccharides
23	L-Fucitol	C6H14O5	166.084	[M-H]-	665.21	161.04	-30.00	437774	13074-06-1	Others	Saccharides
24	Nystose	C24H42O21	666.222	[M-H]-	421.08	241.01	-30.00	8.00191e+06	13133-07-8	Others	Saccharides
25	D-Mannose	C6H12O6	180.063	[M-H]-	665.21	341.11	-30.00	4.56593e+06	3458-28-4	Others	Saccharides
26	D-Maltotetraose	C24H42O21	666.222	[M-H]-	505.18	127.03	-30.00	766525	34612-38-9	Others	Saccharides
27	Trehalose 6-phosphate	C12H23O14P	422.082	[M-H]-	149.1	65.04	-30.00	99563.6	4484-88-2	Others	Saccharides
28	Stachyose	C24H42O21	666.222	[M-H]-	179.056	59.0139	-30.00	6.84842e+06	470-55-3	Others	Saccharides
30	D-Glucose	C6H12O6	180.063	[M-H]-	179.06	59.01	-30.00	4.73584e+06	50-99-7	Others	Saccharides
32	D-Fructose	C6H12O6	180.063	[M-H]-	169.05	67.05	-30.00	7.49879e+06	57-48-7	Others	Saccharides
33	D-Galactose	C6H12O6	180.063	[M-H]-	168.06	150.05	-30.00	3.37172e+06	59-23-4	Others	Saccharides
34	Laminaran	C18H32O16	504.169	[M-H]-	277.11	205.05	-30.00	173348	9008-22-4	Others	Saccharides

## Sheet: Alkaloids
NO.	Compounds	Formula	Molecular weight (Da)	Ionization model	Precursor ion (Da)	Product ion (Da)	Collision Energy (eV)	Peak Area	CAS	Class I	Class II
1	N-(2-Hydroxy-4-methoxyphenyl)acetamide	C9H11NO3	181.074	[M+H]+	182.08	91.05	40.00	7.16066e+07	58469-06-0	Alkaloids	Phenolamine
2	Pyran[3,4-b]indole-2-ketone	C11H9O2N	187.063	[M+H]+	188.07	118.07	40.00	6.11761e+07	-	Alkaloids	Plumerane
3	3,5-Dihydro-2H-Furo[3,2-C]Quinolin-4-One	C11H9NO2	187.063	[M+H]+	188.07	118.07	40.00	5.69914e+07	-	Alkaloids	Quinoline alkaloids
4	1-Methoxy-indole-3-acetamide	C11H12N2O2	204.09	[M+H]+	205.1	146.06	40.00	5.54157e+07	-	Alkaloids	Plumerane
5	naphthisoxazol A	C11H9NO2	187.063	[M+H]+	188.07	118.06	30.00	3.34548e+07	-	Alkaloids	Alkaloids
6	3-amino-2-naphthoic acid	C11H9O2N	187.063	[M+H]+	188.07	118.06	30.00	3.22274e+07	-	Alkaloids	Alkaloids
7	6-Deoxyfagomine	C6H13NO2	131.095	[M+H]+	132.1	57.03	40.00	1.79944e+07	197449-09-5	Alkaloids	Piperidine alkaloids
8	Lycoperodine-1	C12H12N2O2	216.09	[M+H]+	217.1	144.08	30.00	1.32789e+07	42438-90-4	Alkaloids	Alkaloids
9	N-benzoyl-2-aminoethyl-β-D-glucopyranoside	C15H21NO7	327.132	[M+H]+	328.13	310.12	30.00	1624505	-	Alkaloids	Alkaloids
10	Hydroxymenisdaurin D	C14H21NO8	331.127	[M+H]+	332.13	152.07	30.00	1.62405e+06	-	Alkaloids	Alkaloids
11	Stearamide	C18H37NO	283.288	[M+H]+	284.3	102.09	30.00	884344	124-26-5	Alkaloids	Alkaloids
12	Indole-3-carboxaldehyde	C9H7NO	145.053	[M+H]+	146.06	91.05	40.00	873697	487-89-8	Alkaloids	Plumerane
13	Casuarine Analogue	C9H17NO5	219.111	[M+H]+	220.12	90.06	30.00	778228	-	Alkaloids	Alkaloids
14	Acetoxyindole N-Glucoside	C16H19NO7	337.116	[M+H]+	338.12	176.07	40.00	541643	-	Alkaloids	Plumerane
15	octadecadienoic acid amide	C18H33NO	279.256	[M+H]+	280.26	81.07	30.00	534656	-	Alkaloids	Alkaloids
16	Α-hydroxyquinoline	C9H7NO	145.053	[M+H]+	146.06	118.06	30.00	484127	-	Alkaloids	Alkaloids
17	8-hydroxyquinoline	C9H7NO	145.053	[M+H]+	146.06	91.05	40.00	353094	148-24-3	Alkaloids	Quinoline alkaloids
18	Tatarine	C15H20N2O6	324.132	[M+H]+	325.14	191.08	30.00	224834	-	Alkaloids	Alkaloids
19	1-Acetyl-β-carboline	C13H10N2O	210.079	[M+H]+	211.09	193.07	40.00	116712	-	Alkaloids	Plumerane
20	N-(3-hydroxy-4-methoxyphenethyl)-4-hydroxybutanamide	C14H21NO4	267.147	[M+H]+	268.15	136.06	40.00	5.30427e+07	-	Alkaloids	Phenolamine
21	(2R,3S)-2-[(5R,7R)-5,7-dihydroxy-7-methyl-5,6-dihydrocyclopenta[c]pyridin-2-ium-2-yl]-3-methylpentanoic acid	C15H22NO4+	280.155	[M+H]+	280.15	166.09	30.00	2.70183e+07	-	Alkaloids	Alkaloids
22	Erysodine	C18H21NO3	299.152	[M+H]+	300.15	268.12	30.00	7.02452e+06	-	Alkaloids	Alkaloids
23	5H,6H,7H,8H,9H-cyclohepta[c]pyridin-7-ol	C10H13NO	163.1	[M+H]+	164.07	105.06	30.00	6.24604e+06	-	Alkaloids	Alkaloids
24	3-pyridine-methanol-O-β-D-glucopyranosyl	C12H17NO6	271.106	[M+H]+	272.11	110.06	40.00	1655856	-	Alkaloids	Pyridine alkaloids
25	4,5,6-Trihydroxy-2-cyclohexen-1-ylideneacetonitrile	C8H9NO3	167.058	[M+H]+	168.07	105.03	30.00	734943	-	Alkaloids	Alkaloids
26	(R)-1,10-Dimethoxy-6-methyl-5,6,6a,7-tetrahydro-4H-dibenzo[de,g]quinoline-2,9-diol	C19H21NO4	327.147	[M+H]+	328.15	296.11	30.00	349868	-	Alkaloids	Alkaloids
27	6-beta-d-glucopyranosyloxyindole-3-carboxylic acid	C15H17NO8	339.095	[M+H]+	340.1	178.05	40.00	284294	-	Alkaloids	Plumerane
28	N-Feruloylphenylalanine	C19H19NO5	341.126	[M+H]+	342.13	177.06	40.00	130307	-	Alkaloids	Phenolamine
29	Dhurrin-6'-O-Glucoside	C20H27NO12	473.153	[M+H]+	474.16	312.11	40.00	113932	-	Alkaloids	Phenolamine
30	3,5-Bis(3-methoxy-4-hydroxyphenyl)-2,3-dihydro-2(1H)-pyridinone	C19H19NO5	341.126	[M+H]+	342.13	177.05	40.00	101204	-	Alkaloids	Pyridine alkaloids
31	N-Feruloylmethylagmatine	C16H24N4O3	320.185	[M+H]+	321.19	177.06	40.00	71918.5	-	Alkaloids	Phenolamine
32	N-Monocinnamoylputrescine	C13H18N2O	218.142	[M+H]+	219.15	131.05	40.00	55906.5	-	Alkaloids	Phenolamine
33	N,N-cinnamoylbutanediamine	C13H18N2O	218.142	[M+H]+	219.15	131.05	40.00	53814.8	-	Alkaloids	Phenolamine
34	2-Cyanomethylphenol	C8H7NO	133.053	[M+H]+	134.06	77.04	30.00	29947.5	-	Alkaloids	Alkaloids
35	1-Methyl-2-[(Z)-6-undecyl]-4(1H)-quinolone	C21H29NO	311.225	[M+H]+	312.23	81.07	30.00	20271.2	-	Alkaloids	Alkaloids
36	N-Oleoylethanolamine	C20H39NO2	325.298	[M+H]+	326.31	62.06	30.00	1.35944e+06	111-58-0	Alkaloids	Alkaloids
37	Vicine	C10H16O7N4	304.102	[M+H]+	305.11	143.06	30.00	79622.2	152-93-2	Alkaloids	Alkaloids
38	Nicotianamine	C12H21N3O6	303.143	[M+H]+	304.15	185.09	30.00	347489	34441-14-0	Alkaloids	Alkaloids
39	N-Feruloylputrescine	C14H20N2O3	264.147	[M+H]+	265.15	177.06	40.00	88890.5	501-13-3	Alkaloids	Phenolamine
40	Aromoline	C36H38N2O6	594.273	[M+H]+	595.29	335.26	30.00	7.47434e+06	519-53-9	Alkaloids	Alkaloids
41	L-Carnitine	C7H15NO3	161.105	[M+H]+	162.11	85.03	30.00	2.49678e+06	541-15-1	Alkaloids	Alkaloids
42	Tryptamine	C10H12N2	160.1	[M+H]+	161.11	144.08	40.00	192668	61-54-1	Alkaloids	Plumerane
43	N-benzylformamide	C8H9NO	135.068	[M+H]+	136.07	91.05	30.00	1.1523e+07	6343-54-0	Alkaloids	Alkaloids
44	Cycloxyisoschelhammericine	C19H21NO4	327.147	[M+H]+	328.15	296.13	30.00	433290	66322-14-3	Alkaloids	Alkaloids
45	N-p-Coumaroyloctopamine	C17H17NO4	299.116	[M+H]+	300.11	282.11	40.00	32426	66648-45-1	Alkaloids	Phenolamine
46	Corynoxine	C22H28N2O4	384.205	[M+H]+	385.2	353.18	40.00	155849	6877-32-3	Alkaloids	Plumerane
47	p-Coumaroylagmatine	C14H20N4O2	276.159	[M+H]+	277.17	147.04	40.00	40013.8	7295-86-5	Alkaloids	Phenolamine
48	3-Indolepropionic acid	C11H11NO2	189.079	[M+H]+	190.09	118.07	40.00	30840.5	830-96-6	Alkaloids	Plumerane
49	Quininic acid; 6-Methoxyquinoline-4-Carboxylic Acid	C11H9NO3	203.058	[M+H]+	204.06	161.05	40.00	21796.5	86-68-0	Alkaloids	Quinoline alkaloids
50	Isatin	C8H5NO2	147.032	[M+H]+	148.04	77.04	40.00	91927	91-56-5	Alkaloids	Plumerane
51	Synephrine; 4-[1-Hydroxy-2-(methylamino)ethyl]phenol	C9H13NO2	167.095	[M+H]+	168.1	150.09	40.00	510153	94-07-5	Alkaloids	Phenolamine

## Sheet: Terpenoids
NO.	Compounds	Formula	Molecular weight (Da)	Ionization model	Precursor ion (Da)	Product ion (Da)	Collision Energy (eV)	Peak Area	CAS	Class I	Class II
1	Suyiol	C20H28O2	300.208	[M+H]+	455.36	455.36	30.00	4.56519e+06	-	Terpenoids	Ditepenoids
2	Sugiol	C20H28O2	300.209	[M+H]+	455.35	455.35	30.00	4.55922e+06	511-05-7	Terpenoids	Ditepenoids
3	Macrophypene B	C18H28O2	276.209	[M+H]+	495.18	167.07	30.00	2.78522e+06	-	Terpenoids	Ditepenoids
4	phyllanflexoid A	C20H26O3	314.188	[M+H]+	233.15	187.15	30.00	28240	-	Terpenoids	Ditepenoids
5	Scutebarbolide C	C22H32O8	424.21	[M+H]+	285.22	285.22	30.00	24690.6	-	Terpenoids	Ditepenoids
6	Dehydroabietic aldehyde	C20H28O	284.214	[M+H]+	247.13	203.14	30.00	23899.8	-	Terpenoids	Ditepenoids
7	Maoecrystal P	C20H22O5	342.147	[M+H]+	619.4	437.34	30.00	215524	-	Terpenoids	Ditepenoids
8	6'-O-Cinnamoyl Harpagide	C24H30O11	494.179	[M+H]+	619.39	147.04	30.00	5.64047e+06	1245572-24-0	Terpenoids	Monoterpenoids
9	8-O-(p-Coumaroyl)Harpagide	C24H30O13	526.169	[M+H]+	635.39	453.33	30.00	3.5413e+06	-	Terpenoids	Monoterpenoids
10	6-O-p-Methoxycinnamoylcatalpol	C25H30O12	522.174	[M+H]+	345.12	165.06	30.00	2.74847e+06	121710-02-9	Terpenoids	Monoterpenoids
11	Viteoid I	C9H12O4	184.074	[M+H]+	363.13	165.05	30.00	670370	-	Terpenoids	Monoterpenoids
12	11-methoxy viburtinal	C10H8O3	176.047	[M+H]+	293.21	149.1	30.00	199596	-	Terpenoids	Monoterpenoids
13	Hydroxycarvine	C10H14O2	166.099	[M+H]+	439.36	203.18	30.00	6.65545e+06	-	Terpenoids	Monoterpenoids
14	Dehydroxysecologanic acid	C16H22O9	358.126	[M+H]+	619.39	147.04	30.00	807515	-	Terpenoids	Monoterpenoids
15	Plantarenaloside glucoside	C22H34O14	522.194	[M+H]+	221.16	221.15	30.00	300285	-	Terpenoids	Monoterpenoids
16	Sweroside	C16H22O9	358.126	[M+H]+	487.34	405.32	30.00	731198	14215-86-2	Terpenoids	Monoterpenoids
17	Picroside I	C24H28O11	492.163	[M+H]+	473.36	409.35	30.00	39491.2	27409-30-9	Terpenoids	Monoterpenoids
18	2,6-Dimethyl-6-hydroxy-2,7-octadienyl-β-D-glucoside (Betulalbuside A; Betulabuside A)	C16H28O7	332.183	[M+H]+	231.14	185.13	30.00	52164.2	64776-96-1	Terpenoids	Monoterpenoids
19	Actinidialactone	C10H14O2	166.099	[M+H]+	471.34	425.34	30.00	340084	76729-80-1	Terpenoids	Monoterpenoids
20	Carvylacetate	C12H18O2	194.131	[M+H]+	489.36	443.35	30.00	102302	97-42-7	Terpenoids	Monoterpenoids
21	Isogermafurenolide	C15H20O2	232.146	[M+H]+	177.05	134.04	30.00	3.55832e+06	-	Terpenoids	Sesquiterpenoids
22	Atractylenolide Ⅱ	C15H20O2	232.146	[M+H]+	309.21	119.09	30.00	3.32947e+06	73069-14-4	Terpenoids	Sesquiterpenoids
23	Dehydrosaussurea lactone	C15H20O2	232.146	[M+H]+	1073.59	439.36	30.00	3.28679e+06	-	Terpenoids	Sesquiterpenoids
24	Costunolide	C15H20O2	232.146	[M+H]+	455.35	203.18	30.00	2.4637e+06	553-21-9	Terpenoids	Sesquiterpenoids
25	Glechomanolide	C15H20O2	232.146	[M+H]+	471.35	205.16	30.00	2.39237e+06	38146-68-8	Terpenoids	Sesquiterpenoids
26	JiangxiBaiyingsu I	C18H28O3	292.204	[M+H]+	471.35	201.16	30.00	1.26167e+06	-	Terpenoids	Sesquiterpenoids
27	Linderenol	C15H18O2	230.131	[M+H]+	487.34	425.34	30.00	270022	26146-27-0	Terpenoids	Sesquiterpenoids
28	JiangxiBaiyingsu H	C18H28O4	308.199	[M+H]+	489.36	205.16	30.00	153566	-	Terpenoids	Sesquiterpenoids
29	7βH-guaia-1(10)-en-12,8β-olide	C15H20O3	248.141	[M+H]+	469.33	423.33	30.00	192730	-	Terpenoids	Sesquiterpenoids
30	3β-Acetoxyspirillanone(ISO2)	C17H26O3	278.188	[M+H]+	469.33	423.33	30.00	117492	-	Terpenoids	Sesquiterpenoids
31	10Hβ-9-oxoageraphorone	C15H22O2	234.162	[M+H]+	471.35	407.33	30.00	86613.4	-	Terpenoids	Sesquiterpenoids
32	3-(3'-Hydroxybutyl)-2,4,4-trimethylcyclohexa-2,5-dienone malonyl glucoside	C22H32O10	456.199	[M+H]+	333.2	251.2	30.00	75529.2	-	Terpenoids	Sesquiterpenoids
33	Furanodienone	C15H18O2	230.131	[M+H]+	489.36	407.33	30.00	17677.5	24268-41-5	Terpenoids	Sesquiterpenoids
34	10α-Hydroxy-cadin-4-en-15-al	C15H24O2	236.178	[M+H]+	489.36	425.34	30.00	199113	398147-37-0	Terpenoids	Sesquiterpenoids
35	Ilicic acid	C15H24O3	252.173	[M+H]+	487.34	441.34	30.00	17248.2	4586-68-9	Terpenoids	Sesquiterpenoids
36	3-p-Coumaroyloxy-2-methoxyurs-12-en-28-oic acid (Guajanoic acid)	C39H54O6	618.392	[M+H]+	285.22	201.13	30.00	5.93633e+06	-	Terpenoids	Triterpene
37	Caffeoylmaslinic Acid	C39H54O7	634.387	[M+H]+	453.34	407.32	30.00	4.07748e+06	-	Terpenoids	Triterpene
38	p-Coumaroyleuscaphic acid	C39H54O6	618.392	[M+H]+	453.34	407.33	30.00	2.7015e+06	-	Terpenoids	Triterpene
39	3-[[3-(4-Hydroxyphenyl)propenoyl]oxy]-2-hydroxyurs-12-ene-28-oic acid (Jacoumaric Acid)	C39H54O6	618.392	[M+H]+	471.35	471.35	30.00	2.26638e+06	63303-42-4	Terpenoids	Triterpene
40	3-O-Feruloyleuscaphic acid	C40H56O8	664.398	[M+H]+	471.35	471.34	30.00	2.17518e+06	-	Terpenoids	Triterpene
41	3-O-p-Coumaroyltormentic acid	C39H54O7	634.387	[M+H]+	453.34	453.34	30.00	2.11983e+06	-	Terpenoids	Triterpene
42	3-O-Caffeoyl-9-hydroxylup-20(30)-en-7-one (Querspicatin A)	C39H54O6	618.392	[M+H]+	167.11	91.05	30.00	1.80678e+06	126240-04-8	Terpenoids	Triterpene
43	2ɑ-hydroxy-3β-trans-p-hydroxycinnamoyloxy oleanolic acid	C39H54O6	618.392	[M+H]+	539.18	193.05	30.00	1.73248e+06	-	Terpenoids	Triterpene
44	13,28-Epoxyolean-11-en-3-one	C30H46O2	438.35	[M+H]+	635.39	453.33	30.00	786258	-	Terpenoids	Triterpene
45	3-O-p-Coumaroyl-2-hydroxyurs-12-en-28-oic acid	C39H54O6	618.392	[M+H]+	487.34	487.34	30.00	584849	-	Terpenoids	Triterpene
46	2,19-Dihydroxy-3-oxo-24-norolean-12-en-28-oic acid	C30H46O5	486.334	[M+H]+	455.35	437.35	30.00	358369	-	Terpenoids	Triterpene
47	orthosiphonoic acid	C30H48O4	472.355	[M+H]+	507.17	179.05	30.00	314417	-	Terpenoids	Triterpene
48	3,29-Dihydroxyolean-12-en-28-oic acid (Mesembryanthemoidigenic acid)	C30H48O4	472.355	[M+H]+	359.13	151.04	30.00	281598	4871-87-8	Terpenoids	Triterpene
49	Rubinic acid	C30H46O4	470.34	[M+H]+	473.36	427.36	30.00	235845	94662-96-1	Terpenoids	Triterpene
50	2,3,23-Trihydroxyolean-12-en-28-oic acid(ISO-1)	C30H48O5	488.35	[M+H]+	471.35	407.33	30.00	214704	-	Terpenoids	Triterpene
51	Mudanpinoic acid A	C30H46O3	454.345	[M+H]+	503.34	439.32	30.00	147471	203511-36-8	Terpenoids	Triterpene
52	19-Hydroxy-2-(hydroxymethyl)-A(1)-norursa-2,12-dien-28-oic acid (Coleonolic acid)	C30H46O4	470.34	[M+H]+	315.2	315.2	30.00	128431	-	Terpenoids	Triterpene
53	19-Hydroxy-3-oxo-24-norolean-12-en-28-oic acid(ISO3)	C30H46O4	470.34	[M+H]+	549.16	489.16	30.00	112643	-	Terpenoids	Triterpene
54	Hovenic acid	C30H48O5	488.35	[M+H]+	617.38	435.33	30.00	112086	-	Terpenoids	Triterpene
55	Elaeocarpucin F	C30H48O5	488.35	[M+H]+	457.33	203.14	30.00	98897.9	-	Terpenoids	Triterpene
56	2,3-Dihydroxyurs-12-en-29-oic acid (Maslinic acid)	C30H48O4	472.355	[M+H]+	487.34	469.33	30.00	93059.4	4373-41-5	Terpenoids	Triterpene
57	3,4-Secodammara-4(28),20,24-trien-3,26-dioic acid	C30H46O4	470.34	[M+H]+	249.15	185.13	30.00	83196	-	Terpenoids	Triterpene
58	2,3,19-Trihydroxyolean-12-en-28-oic acid (Arjunic acid)	C30H48O5	488.35	[M+H]+	469.33	469.33	30.00	68151.4	31298-06-3	Terpenoids	Triterpene
59	2,3,19-Trihydroxyurs-12-en-28-oic acid (Tormentic acid)*	C30H48O5	488.35	[M+H]+	499.31	437.3	30.00	50572.4	13850-16-3	Terpenoids	Triterpene
60	2,3,23-Trihydroxyurs-12,19-dien-28-oic acid	C30H46O5	486.334	[M+H]+	279.19	149.02	30.00	46482.5	-	Terpenoids	Triterpene
61	Elaeocarpucin G	C30H46O5	486.334	[M+H]+	455.35	409.35	30.00	37197.5	-	Terpenoids	Triterpene
62	Ceanothetric Acid	C30H44O7	516.309	[M+H]+	523.18	193.05	30.00	36309	-	Terpenoids	Triterpene
63	2-Hydroxypyracrenic acid	C39H54O7	634.387	[M+H]+	651.38	163.03	30.00	2.08269e+06	-	Terpenoids	Triterpene
64	Lupane-20(29)-en-3-on-28-oic acid	C30H46O3	454.345	[M+H]+	503.34	503.34	30.00	819623	-	Terpenoids	Triterpene
65	13-Hydroxy oleanolic acid-3-oxo-28-acid	C30H48O4	472.355	[M+H]+	501.35	455.36	30.00	752104	-	Terpenoids	Triterpene
66	6-Hydroxy-lupane-20(29)-en-3-one-28-oic acid	C30H46O4	470.34	[M+H]+	519.33	455.32	30.00	651057	-	Terpenoids	Triterpene
67	2,3,19-Trihydroxy-24-oxo-olean-12-en-28-oic acid	C30H46O6	502.329	[M+H]+	439.36	203.18	30.00	596849	-	Terpenoids	Triterpene
68	3-p-Coumaroyloxy-2-hydroxyurs-12,18-dien-28-oic acid (Guajavanoic acid)	C39H52O6	616.376	[M+H]+	349.15	187.1	30.00	309815	-	Terpenoids	Triterpene
69	19-Hydroxy-2-oxo-nor-A(3)-urs-12-en-28-oic acid (Rubuminatus A)	C29H44O4	456.324	[M+H]+	1073.59	309.12	30.00	278760	-	Terpenoids	Triterpene
70	27,28-Dicarboxyl ursolic acid	C30H46O5	486.334	[M+H]+	635.39	453.34	30.00	269163	-	Terpenoids	Triterpene
71	3-Hydroxy-29(or30)-al-olean-12-en-28-oic acid	C30H46O4	470.34	[M+H]+	485.33	423.33	30.00	125030	-	Terpenoids	Triterpene
72	3-Hydroxyurs-12,19-dien-28-oic acid (Sanguisorbigenin)	C30H46O3	454.345	[M+H]+	635.39	147.04	30.00	104999	-	Terpenoids	Triterpene
73	3-Acetoxy-18-hydroperoxy-12-oleanen-11-one(ISO1)	C32H50O5	514.366	[M+H]+	455.32	455.32	30.00	41568.5	-	Terpenoids	Triterpene
74	3-O-Cafeoyltormentic acid	C39H54O8	650.382	[M+H]+	497.17	437.2	30.00	38866.1	-	Terpenoids	Triterpene
75	3-Hydroxyolean-12-ene-28,30-dioic acid 30-methyl ester (Serjanic Acid)	C31H48O5	500.35	[M+H]+	441.37	441.37	30.00	29733.8	-	Terpenoids	Triterpene
76	2,3,19,23-Tetrahydroxy-24-oxo-olean-12-en-28-oic acid	C30H46O7	518.324	[M+H]+	469.33	407.33	30.00	28669.8	-	Terpenoids	Triterpene
77	Olean-12-ene-3,16-dione (Maniladione)	C30H46O2	438.35	[M+H]+	471.35	471.35	30.00	26828.9	-	Terpenoids	Triterpene
78	24-p-Coumaroyloxy-2,3-dihydroxyurs-12-en-28-oic acid (Guavacoumaric acid)(ISO2)	C39H54O7	634.387	[M+H]+	359.13	179.07	30.00	10547.6	-	Terpenoids	Triterpene
79	24-Hydroxy-3-oxooleana-11,13(18)-dien-28-oic acid	C30H44O4	468.324	[M+H]+	473.36	409.34	30.00	10117.9	-	Terpenoids	Triterpene
80	3-O-p-Coumaroylrotundic acid	C39H54O7	634.387	[M+H]+	471.35	471.35	30.00	6615.93	-	Terpenoids	Triterpene
81	3-Hydroxy-11-oxours-12-en-28-oic acid (11-Keto-ursolic acid)	C30H46O4	470.34	[M+H]+	487.34	469.33	30.00	21654.9	105870-59-5	Terpenoids	Triterpene
82	13,28-Epoxy-11-ursen-3-one (Momordicinin)	C30H46O2	438.35	[M+H]+	487.34	405.31	30.00	20039.9	128529-78-2	Terpenoids	Triterpene
83	3-Hydroxylup-20(29)-en-28-al (Betulinaldehyde)	C30H48O2	440.365	[M+H]+	231.14	185.13	30.00	402097	13159-28-9	Terpenoids	Triterpene
84	3,23-Dihydroxylup-20(29)-en-28-oic acid (Oplopanaxogenin C)	C30H48O4	472.355	[M+H]+	263.13	219.13	30.00	32494.1	161984-22-1	Terpenoids	Triterpene
85	11,12-epoxy-13-hydroxy-3-Oxooleanane-28-oic acid gamma-lactone (Liquidambaric Lactone)	C30H44O4	468.324	[M+H]+	373.11	123.01	30.00	149996	185051-75-6	Terpenoids	Triterpene
86	2-Hydroxymethyl-A(1)-nor-19,24-dihydroxyurs-2,12-dien-28-oic acid (Rosamultic acid)	C30H46O5	486.334	[M+H]+	237.19	81.07	30.00	303094	214285-76-4	Terpenoids	Triterpene
87	Tohogenol	C30H52O3	460.392	[M+H]+	471.351	471.351	30.00	16148.4	28618-19-1	Terpenoids	Triterpene
88	3-Hydroxyolean-12-ene-27,28-dioic acid (Cincholic acid)	C30H46O5	486.334	[M+H]+	425.38	203.17	30.00	29317.9	5948-32-3	Terpenoids	Triterpene
89	Olean-12-en-3-one (β-Amyrone)	C30H48O	424.37	[M+H]+	333.19	287.08	30.00	10425.3	638-97-1	Terpenoids	Triterpene
90	3-Hydroxyolean-12-ene-28,29-dioic acid (Serratagenic Acid)	C30H46O5	486.334	[M+H]+	487.34	451.32	30.00	16169.9	6488-64-8	Terpenoids	Triterpene
91	Scrokoelziside A	C54H88O21	1072.58	[M+H]+	455.35	455.35	30.00	148895	-	Terpenoids	Triterpene Saponin
92	Scrokoelziside B	C54H88O21	1072.58	[M+H]+	195.14	67.05	30.00	22253	-	Terpenoids	Triterpene Saponin
93	6'-O-D-Glucosylloganic acid	C22H34O15	538.19	[M+NH4]+	185.08	77.04	30.00	912853	-	Terpenoids	Monoterpenoids
94	3'-O-D-glucosylgentiopicroside	C22H30O14	518.164	[M+NH4]+	301.22	301.22	30.00	220296	-	Terpenoids	Monoterpenoids
95	Oleanolic acid-3-O-glucosyl(1→2)glucoside	C42H68O13	780.466	[M+NH4]+	375.13	195.07	30.00	36651.7	-	Terpenoids	Triterpene Saponin
96	Isopimaradieneone*	C20H30O	286.23	[M-H]-	455.35	455.35	-30.00	4.15637e+06	-	Terpenoids	Ditepenoids
97	Pimaradienone*	C20H30O	286.23	[M-H]-	619.4	437.34	-30.00	3.18928e+06	-	Terpenoids	Ditepenoids
98	Negundoin A	C22H34O5	378.241	[M-H]-	301.22	259.17	-30.00	694767	-	Terpenoids	Ditepenoids
99	Kaurenoic Acid	C20H30O2	302.225	[M-H]-	301.22	259.17	-30.00	445847	6730-83-2	Terpenoids	Ditepenoids
100	7,13,15-Abietatrienoic acid	C20H28O2	300.209	[M-H]-	421.14	169.05	-30.00	429964	-	Terpenoids	Ditepenoids
101	Pimaric acid*	C20H30O2	302.225	[M-H]-	285.22	285.22	-30.00	392748	127-27-5	Terpenoids	Ditepenoids
102	Levopimaric acid*	C20H30O2	302.225	[M-H]-	635.39	435.32	-30.00	378869	79-54-9	Terpenoids	Ditepenoids
103	Isopimaric acid*	C20H30O2	302.225	[M-H]-	233.15	187.15	-30.00	217792	5835-26-7	Terpenoids	Ditepenoids
104	Ajugalaevigatic acid	C22H36O4	364.261	[M-H]-	511.18	147.04	-30.00	148319	-	Terpenoids	Ditepenoids
105	Araucarolone	C20H30O4	334.214	[M-H]-	233.15	187.14	-30.00	74822.1	-	Terpenoids	Ditepenoids
106	Carnosic Acid Quinone	C20H26O4	330.183	[M-H]-	277.22	93.07	-30.00	1332.78	-	Terpenoids	Ditepenoids
107	Methyl abieta	C21H32O2	316.24	[M-H]-	523.18	177.06	-30.00	573562	-	Terpenoids	Ditepenoids
108	Lathyrol	C20H30O4	334.214	[M-H]-	233.15	131.08	-30.00	2335.18	34420-19-4	Terpenoids	Ditepenoids
109	Abietic acid	C20H30O2	302.225	[M-H]-	233.15	131.09	-30.00	207592	514-10-3	Terpenoids	Ditepenoids
110	Vitexilactone	C22H34O5	378.241	[M-H]-	529.35	469.33	-30.00	769725	61263-49-8	Terpenoids	Ditepenoids
111	Acetylcatalpol	C17H26O12	422.142	[M-H]-	665.4	409.3	-30.00	4.46483e+06	-	Terpenoids	Monoterpenoids
112	6-DeoxyCatalpol	C15H22O9	346.126	[M-H]-	619.4	437.34	-30.00	1.95653e+06	99499-99-7	Terpenoids	Monoterpenoids
113	Harpagide	C15H24O10	364.137	[M-H]-	619.39	437.34	-30.00	1.65881e+06	6926-08-5	Terpenoids	Monoterpenoids
114	3,4-Dihydro-6-O-feruloylcatalpol	C25H32O13	540.184	[M-H]-	377.23	295.23	-30.00	3.48426e+06	-	Terpenoids	Monoterpenoids
115	3'-O-Feruloyl Swertiamarin	C26H30O13	550.169	[M-H]-	665.38	605.36	-30.00	438824	-	Terpenoids	Monoterpenoids
116	6-O-Feruloylajugol	C25H32O12	524.189	[M-H]-	299.2	227.11	-30.00	95770.5	-	Terpenoids	Monoterpenoids
117	Rehmapicroside	C16H26O8	346.163	[M-H]-	301.22	301.22	-30.00	13570	104056-82-8	Terpenoids	Monoterpenoids
118	6-O-Vanilloylajugol	C23H30O12	498.174	[M-H]-	301.22	301.22	-30.00	1.15314e+06	124168-04-3	Terpenoids	Monoterpenoids
119	Geniposidic acid	C16H22O10	374.121	[M-H]-	473.36	409.35	-30.00	49121.7	27741-01-1	Terpenoids	Monoterpenoids
120	8-Epiloganic acid	C16H24O10	376.137	[M-H]-	301.22	301.22	-30.00	163653	82509-41-9	Terpenoids	Monoterpenoids
121	Atractylenolide Ⅲ	C15H20O3	248.141	[M-H]-	363.25	281.25	-30.00	3.13299e+06	73030-71-4	Terpenoids	Sesquiterpenoids
122	Kobusone	C14H22O2	222.162	[M-H]-	489.36	201.16	-30.00	508440	24173-71-5	Terpenoids	Sesquiterpenoids
123	6'-O-Glucosylaucubin	C21H32O14	508.179	[M-H]-	473.36	187.15	-30.00	810393	-	Terpenoids	Sesquiterpenoids
124	Artemisiifolin	C15H20O4	264.136	[M-H]-	569.34	487.34	-30.00	69253.5	26931-87-3	Terpenoids	Sesquiterpenoids
125	Eucommioside	C15H26O9	350.158	[M-H]-	487.34	423.33	-30.00	23287.2	-	Terpenoids	Terpene
126	3-Hydroxylup-20(29)-en-28-oic acid (Betulinic acid)	C30H48O3	456.36	[M-H]-	517.32	471.31	-30.00	3.29427e+07	472-15-1	Terpenoids	Triterpene
127	Oxyallobetulin	C30H48O3	456.36	[M-H]-	315.19	187.11	-30.00	3.02436e+07	-	Terpenoids	Triterpene
128	24,30-Dihydroxy-12(13)-ene-lupeol	C30H48O3	456.36	[M-H]-	425.22	365.19	-30.00	2.86182e+07	-	Terpenoids	Triterpene
129	Viburnenone B1 methyl ester	C32H50O6	530.361	[M-H]-	329.17	301.18	-30.00	2.27838e+06	-	Terpenoids	Triterpene
130	Bruceajavanone B	C39H54O9	666.377	[M-H]-	556.22	179.07	-30.00	520865	-	Terpenoids	Triterpene
131	2,3,23-Trihydroxyurs-12-en-28-oic acid (Asiatic acid)*	C30H48O5	488.35	[M-H]-	523.2	163.08	-30.00	103826	464-92-6	Terpenoids	Triterpene
132	2,3-Dihydroxy-5(6),12(13)-diene-ursolic acid*	C30H46O4	470.34	[M-H]-	536.2	195.06	-30.00	90200.4	-	Terpenoids	Triterpene
133	2,3-Dihydroxyurs-12,18-dien-28-oic acid*	C30H46O4	470.34	[M-H]-	343.15	177.05	-30.00	85056.2	-	Terpenoids	Triterpene
134	2,3-Diacetoxy-18-hydroxyoleana-5,12-dien-28-oic acid	C34H50O7	570.356	[M-H]-	471.35	201.16	-30.00	61446.7	-	Terpenoids	Triterpene
135	3-Oxours-12-en-28-oic acid (Ursonic acid)*	C30H46O3	454.345	[M-H]-	235.17	159.12	-30.00	6356.89	6246-46-4	Terpenoids	Triterpene
136	3-Oxoolean-12-en-28-oic Acid (Oleanonic acid)*	C30H46O3	454.345	[M-H]-	517.31	455.32	-30.00	4712.73	17990-42-0	Terpenoids	Triterpene
137	3,24-Dihydroxy-17,21-semiacetal-12(13)oleanolic fruit	C30H48O4	472.355	[M-H]-	457.2	133.1	-30.00	2.12076e+07	-	Terpenoids	Triterpene
138	2,3-Dihydroxy-12-ursen-28-oic acid*	C30H48O4	472.355	[M-H]-	473.36	473.36	-30.00	1.80319e+07	-	Terpenoids	Triterpene
139	Urs-12(13)-en-3-one-28-oic acid	C30H46O3	454.345	[M-H]-	515.37	437.34	-30.00	1.15013e+07	-	Terpenoids	Triterpene
140	2,3,23-Trihydroxyolean-12-en-28-oic acid*	C30H48O5	488.35	[M-H]-	798.5	439.36	-30.00	1.06936e+06	-	Terpenoids	Triterpene
141	Rubiarbonone E	C30H46O4	470.34	[M-H]-	469.33	423.33	-30.00	139066	-	Terpenoids	Triterpene
142	picfeltarraegenin VI	C30H44O6	500.314	[M-H]-	501.32	421.31	-30.00	124995	-	Terpenoids	Triterpene
143	picfeltarraegenin VII	C30H46O7	518.324	[M-H]-	345.17	165.09	-30.00	85032.5	-	Terpenoids	Triterpene
144	3,13,15-Trihydroxyoleanane-12-one	C30H50O4	474.371	[M-H]-	471.35	453.34	-30.00	57441.4	-	Terpenoids	Triterpene
145	2,3,19,23-Tetrahydroxyurs-12-en-28-oic acid	C30H48O6	504.345	[M-H]-	439.36	109.1	-30.00	31964.8	-	Terpenoids	Triterpene
146	Isoceanothic acid	C30H46O5	486.334	[M-H]-	485.33	485.33	-30.00	10080.2	-	Terpenoids	Triterpene
147	2,3,19-Trihydroxyurs-12-en-23-formyl-28-oic Acid	C30H46O6	502.329	[M-H]-	469.33	423.33	-30.00	7701.47	-	Terpenoids	Triterpene
148	3,23-Dihydroxy-30-noroleana-12,20(29)-dien-28-oic acid (30-Norhederagenin)	C29H44O4	456.324	[M-H]-	485.33	467.32	-30.00	108324	117654-06-5	Terpenoids	Triterpene
149	3-Oxo-19-hydroxyurs-12-en-28-oic acid (Pomonic acid)	C30H46O4	470.34	[M-H]-	487.35	487.35	-30.00	5852.51	13849-90-6	Terpenoids	Triterpene
150	3,19-Dihydroxyurs-12-en-28-oic acid (Pomolic acid)*	C30H48O4	472.355	[M-H]-	471.35	427.35	-30.00	1.69937e+07	13849-91-7	Terpenoids	Triterpene
151	2,19-Dihydroxy-3-oxours-12-en-28-oic acid	C30H46O5	486.334	[M-H]-	493.17	131.05	-30.00	1.32966e+07	176983-21-4	Terpenoids	Triterpene
152	2,3-Dihydroxylup-20(29)-en-28-oic acid (Alphitolic acid)	C30H48O4	472.355	[M-H]-	461.4	461.4	-30.00	2.1946e+07	19533-92-7	Terpenoids	Triterpene
153	3,19,23-Trihydroxyurs-12-en-28-oic acid (Rutundic acid)	C30H48O5	488.35	[M-H]-	333.22	315.21	-30.00	103705	20137-37-5	Terpenoids	Triterpene
154	2-Carboxy-3-hydroxy-A(1)-norlupan-20(29)-en-28-oic acid (Ceanothic acid)	C30H46O5	486.334	[M-H]-	467.32	467.32	-30.00	557115	21302-79-4	Terpenoids	Triterpene
155	2,3,6-Trihydroxyurs-12-en-28-oic acid (Madasiatic acid)*	C30H48O5	488.35	[M-H]-	471.348	471.348	-30.00	139971	26532-66-1	Terpenoids	Triterpene
156	2,3-Dihydroxyolean-12-en-28-oic acid (2-Hydroxyoleanolic acid)	C30H48O4	472.355	[M-H]-	253.18	121.1	-30.00	6527.6	26707-60-8	Terpenoids	Triterpene
157	3,19-Epoxy-3,22-dihydroxydammara-20,24-dien-26-oic acid δ-lactone (Semialactone)	C30H44O4	468.324	[M-H]-	301.22	301.22	-30.00	999709	366450-46-6	Terpenoids	Triterpene
158	2,3-Dihydroxyurs-12-en-28-oic acid (Corosolic acid)*	C30H48O4	472.355	[M-H]-	561.34	59.01	-30.00	1.92094e+07	4547-24-4	Terpenoids	Triterpene
159	3,23-Dihydroxyolean-12-en-28-oic acid (Hederagenin)*	C30H48O4	472.355	[M-H]-	487.34	423.32	-30.00	1.93962e+07	465-99-6	Terpenoids	Triterpene
160	Curcurbitacin IIA	C32H50O8	562.351	[M-H]-	377.23	295.23	-30.00	149141	58546-34-2	Terpenoids	Triterpene
161	3-Hydroxyurs-12-en-28-oic acid (Ursolic acid)	C30H48O3	456.36	[M-H]-	167.11	93.07	-30.00	3.02481e+07	77-52-1	Terpenoids	Triterpene

[truncated: 2 more sheets: Organic acids, Lipids]
